# Supplementary material
Source: publisher figshare collection journal article supplement (https://acs.figshare.com/ndownloader/files/5736777)

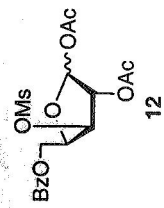

Current Data Parameters  
NAME: R180000R  
EXPNO: 10  
PROCNO: 1

F2 - Acquisition Parameters

Date\_ 20011113  
Time 9.47  
INSTRUM spect  
PROBHD 5 mm BBO BB-1  
PULPROG zgpg30  
TD 65536  
SOLVENT CDCl3  
NS 37  
DS 2  
SWH 10330.578 Hz  
FIDRES 0.157532 Hz  
AQ 3.1719923 sec  
RG 500.6  
RW 48.400 usec  
DE 6.00 usec  
TE 300.2 K  
G1 1.0000000 sec

===== CHANNEL f1 =====

NUC1 1H  
P1 13.70 usec  
PL1 -1.00 dB  
SFO1 500.1330885 MHz

F2 - Processing parameters

SI 32768  
SF 500.1330000 MHz  
WDW EM  
SSB 0  
LB 0.30 Hz  
GB 0  
PC 1.00

1D NMR plot parameters

CK 34.00 cm  
F1P 8.504 ppm  
F1 4253.34 Hz  
F2P 10.271 ppm  
F2 -135.59 Hz  
PPMCK 0.25889 ppm/cm  
HZCK 123.06032 Hz/cm

2.18064  
2.14698  
2.13997  
2.13229  
2.12490  
2.07173

3.21074  
3.14124

4.14244  
4.15673  
4.56595  
4.57487  
4.59041  
4.59935  
4.63459  
4.64466  
4.65743  
4.66819  
4.78419  
4.79734  
4.82468  
4.83611  
5.25135  
5.25418  
5.26214  
5.26500  
5.40674  
5.48120  
5.49314  
5.50601  
5.52675  
5.53592  
5.53801  
5.54747  
6.24305  
6.51397  
6.52308  
7.30680  
7.46243  
7.47798  
7.48122  
7.49390  
7.49692  
7.51294  
7.52068  
7.60374  
7.61716  
8.08563  
8.08841  
8.09204  
8.10059  
8.10284  
8.11725  
8.11922

3.4569  
9.0457  
3.4301

3.4551  
4.5654

2.6258  
3.7750  
1.5714

3.0320  
1.1105  
1.0946

1.4375  
1.0000

2.7038  
5.3339

5.2834

Integral

ppm

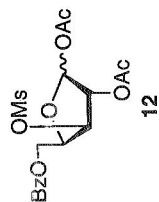

Current Data Parameters  
NAME R1800NOR  
EXPNO 11  
PROCNO 1

F2 - Acquisition Parameters

Date\_ 20011113  
Time 9.54  
INSTRUM spect  
PROBHD 5 mm BBO BB-1  
PULPROG zgpg30  
TD 65536  
SOLVENT CDCl3  
NS 1024  
DS 4  
SWH 31446.541 Hz  
FIDRES 0.479836 Hz  
AQ 1.0420724 sec  
RG 8162  
DM 15.900 usec  
DE 6.00 usec  
TE 300.0 K  
D1 2.00000000 sec  
D11 0.03000000 sec  
D12 0.00020000 sec

===== CHANNEL f1 =====

NUC1 <sup>13</sup>C  
P1 8.00 usec  
PL1 3.00 dB  
SFO1 125.771519 MHz

===== CHANNEL f2 =====

CPDPRG2waltz16  
NUC2 <sup>1</sup>H  
P2 100.00 usec  
PL2 -1.00 dB  
PL12 18.80 dB  
PL13 18.80 dB  
SFO2 500.1320005 MHz

F2 - Processing parameters

SI 32768  
SF 125.7577350 MHz  
WDW EM  
SSB 0  
GB 0  
PC 1.40

1D NMR plot parameters

FX 34.00 cm  
F1P 225.024 ppm  
F1 23555.14 Hz  
F2 15.032 ppm  
F2 -1890.40 Hz  
PPM0 7.35460 ppm/cm  
HZ00 924.69825 Hz/cm

21.432  
21.280  
21.007  
20.756

38.957  
38.815

99.084  
93.185  
80.342  
80.030  
79.738  
78.839  
77.751  
77.496  
77.242  
75.931  
75.691  
62.622  
62.156

133.820  
133.740  
130.256  
130.160  
129.906  
129.859  
128.984  
128.667

169.885  
169.870  
169.714  
169.588  
166.443  
166.360

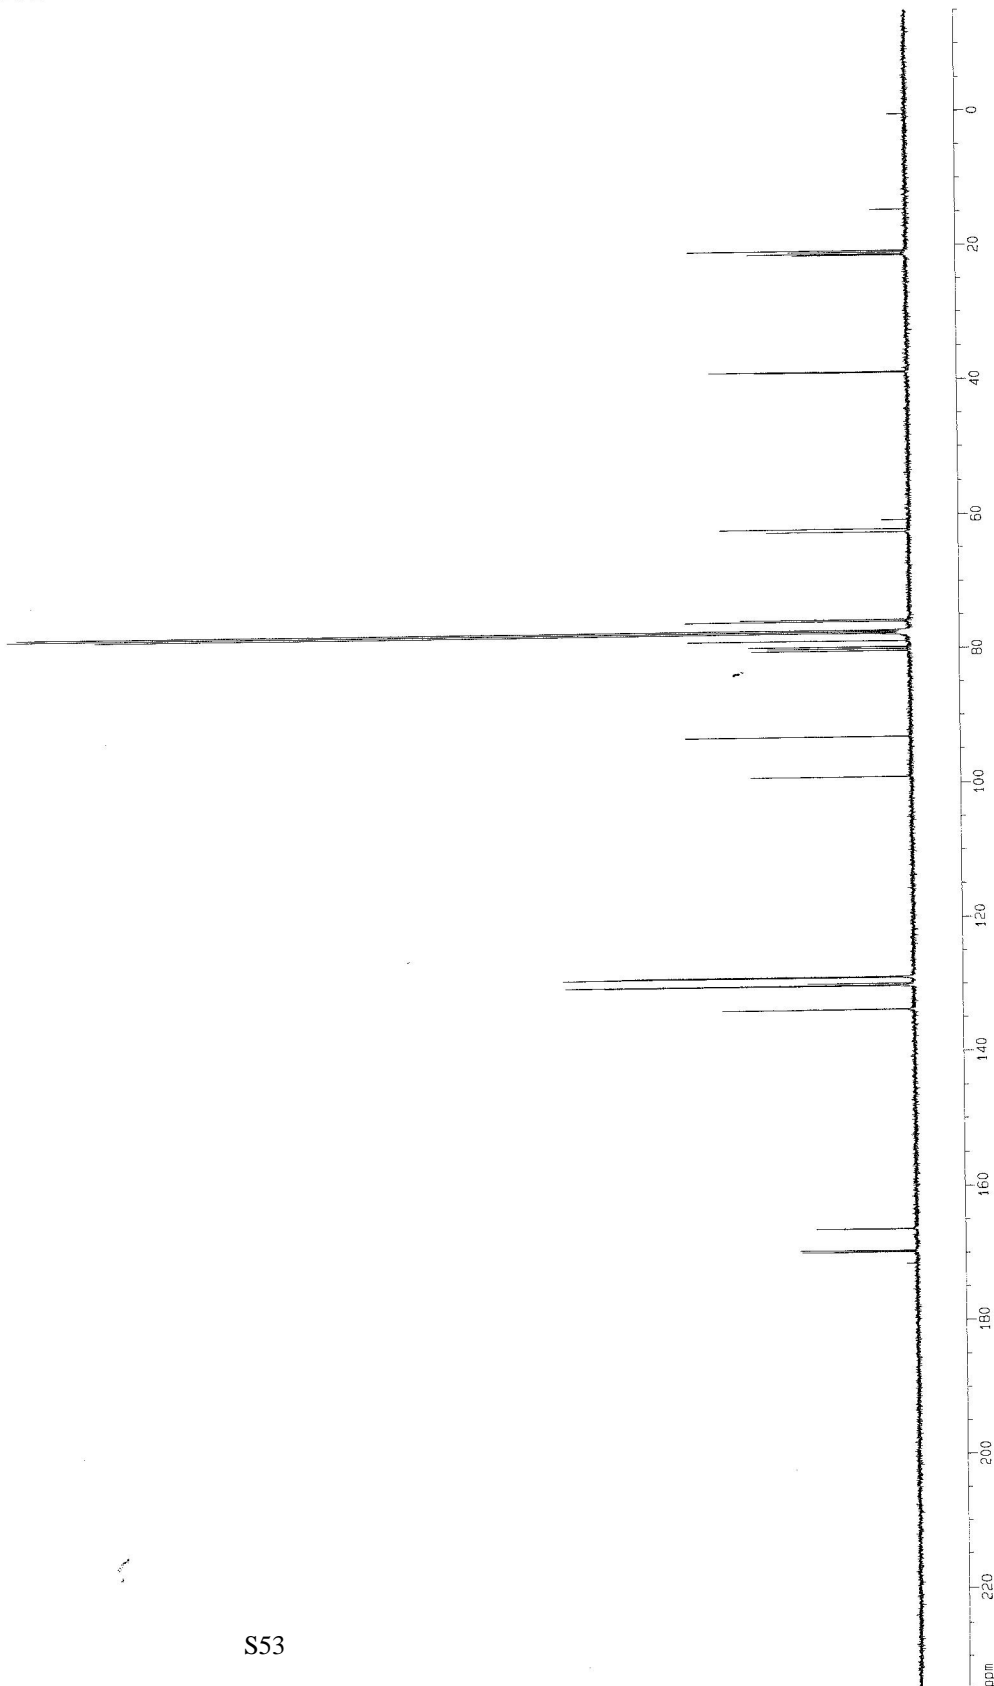

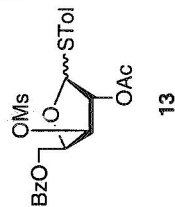

2.38277  
2.37280  
2.25096  
2.17588

3.16451  
3.09948

8.13443  
8.13203  
8.11820  
8.11526  
8.10414  
8.10147  
7.63192  
7.61699  
7.52221  
7.50720  
7.49426  
7.47731  
7.44528  
7.42908  
7.30699  
7.19596  
7.18021  
7.15454  
7.13875  
5.89100  
5.87974  
5.65469  
5.64903  
5.64344  
5.63777  
5.37140  
5.36823  
5.33418  
5.27365  
5.26691  
5.19752  
5.19438  
5.18853  
5.18537  
4.96639  
4.85592  
4.69987  
4.68738  
4.67839  
4.66689  
4.63856  
4.62419  
4.61547  
4.61289

Current Data Parameters  
NAME antonio  
EXPNO 11  
PROCNO 1  
F2 - Acquisition Parameters  
Date\_ 20020803  
Time 12.12  
INSTRUM spect  
PROBHD 5 mm BBO BB-1  
PULPROG zg30  
TO 65536  
SOLVENT CDCl3  
NS 64  
DS 2  
SWH 10330.378 Hz  
FIDRES 0.157632 Hz  
AQ 3.1719923 sec  
RG 228.1  
DW 48.400 usec  
DE 6.00 usec  
TE 300.0 K  
D1 1.00000000 sec

===== CHANNEL f1 =====  
NUC1 1H  
P1 14.25 usec  
PL1 -1.00 dB  
SF01 500.1330895 MHz

F2 - Processing parameters  
SI 131072  
SF 500.1300000 MHz  
WDW EM  
SSB 0  
LB 0.30 Hz  
GB 0  
PC 1.00

1D NMR plot parameters  
CX 34.00 cm  
FIP 9.000 ppm  
F1 4501.17 Hz  
F2P -0.500 ppm  
F2 -250.07 Hz  
PPMCM 0.27941 ppm/cm  
HZCM 133.74220 Hz/cm

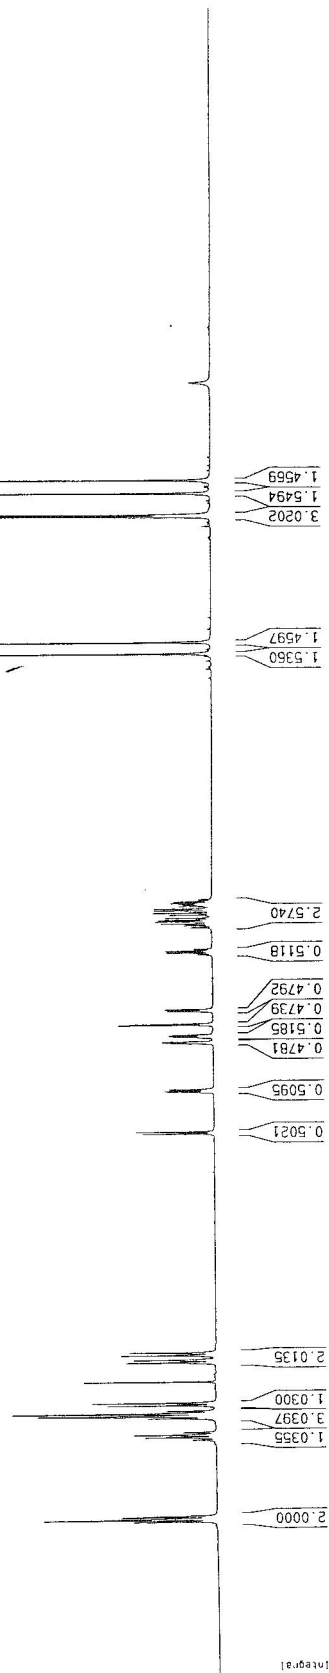

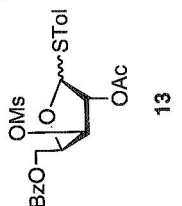

21.588  
21.565  
21.131

39.008  
38.895

61.758  
62.264

75.655  
77.297  
77.551  
77.806  
78.098  
78.868  
80.860  
81.209  
81.517  
89.796  
89.864

128.809  
128.859  
128.916  
129.616  
130.004  
130.218  
130.301  
130.324  
133.445  
133.684  
133.744  
134.233  
138.712  
139.201

166.413  
166.512  
169.927  
170.000

Current Data Parameters  
NAME R1800000R  
EXPNO 31  
PROCNO 1

F2 - Acquisition Parameters  
Date\_ 20011113

Time 13.40

INSTRUM spect

PROBHD 5 mm BBO BB-1

PULPROG zgpg30

TD 65536

SOLVENT CDCl3

NS 325

DS 4

SWH 31446.541 Hz

FIDRES 0.77826 Hz

AQ 1.0420724 sec

RG 1588

DM 15.800 usec

DE 6.00 usec

TE 300.2 K

IE 2.00000000 sec

011 0.03000000 sec

012 0.00000000 sec

===== CHANNEL f1 =====

NUC1 13C

P1 8.00 usec

PL1 3.00 dB

SFO1 125.7715719 MHz

===== CHANNEL f2 =====

CPDPRG2 waltz16

NUC2 1H

P2 100.00 usec

PL2 -1.00 dB

PL12 18.80 dB

PL13 18.80 dB

SFO2 500.1320053 MHz

F2 - Processing parameters

SF 32768

SF 125.7577350 MHz

WDW EM

SSB 0

LB 1.00 Hz

GB 0

PC 1.40

10 NMR plot parameters

CX 34.00 cm

F1P 175.640 ppm

F1 22213.83 Hz

F2P -4.494 ppm

F2 -365.21 Hz

PPMCM 5.32748 ppm/cm

HZCM 689.97186 Hz/cm

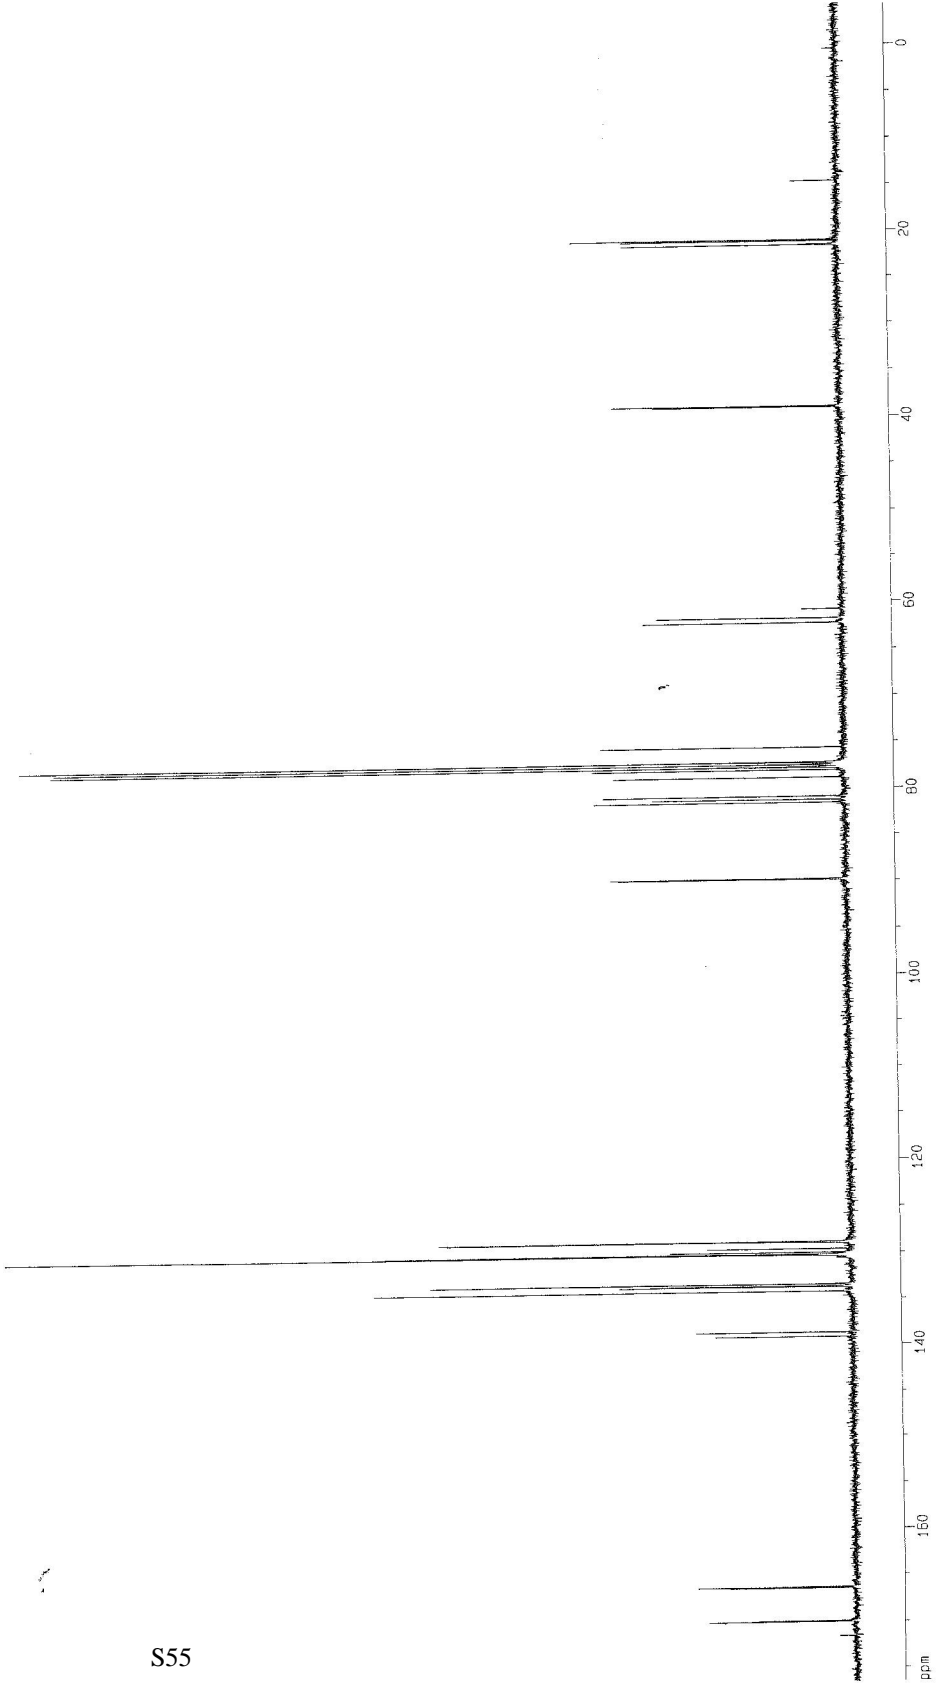

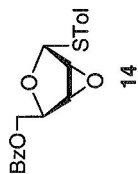

Current Data Parameters  
NAME CALLAM  
EXPNO 50  
PROCNO 1

F2 - Acquisition Parameters  
Date\_ 20020227  
Time 15:19  
INSTRUM spect  
PROBHD 5 mm BBO BB-1  
PULPROG zg30  
TO 65536  
SOLVENT CCl3  
NS 19  
DS 2  
SWH 10330.378 Hz  
FIDRES 0.157632 Hz  
AQ 3.1719923 sec  
RG 50.5  
DM 48.400 usec  
DE 6.00 usec  
TE 300.0 K  
D1 1.0000000 sec

===== CHANNEL f1 =====  
NUC1 1H  
P1 13.70 usec  
PL1 -1.00 dB  
SF01 500.1300895 MHz

F2 - Processing parameters  
SI 32768  
SF 500.1300000 MHz  
WDW EM  
SSB 0  
LB 0.30 Hz  
GB 0  
PC 1.00

10 NMR plot parameters  
CX 34.00 cm  
FJP 9.057 ppm  
F1 4529.57 Hz  
F2 -0.382 ppm  
F2 -190.95 Hz  
PPMCM 0.27751 ppm/cm  
HZCM 138.83875 Hz/cm

2.37892  
2.35984

4.62670  
4.61556  
4.61255  
4.60538  
4.58226  
4.57150  
4.56775  
4.55741  
4.05885  
4.05354  
4.03131  
4.02594

5.57798

8.16079  
8.14859  
8.14179  
7.65533  
7.64045  
7.62776  
7.62552  
7.53151  
7.51681  
7.50340  
7.50048  
7.45985  
7.45363  
7.30657  
7.17886  
7.15283

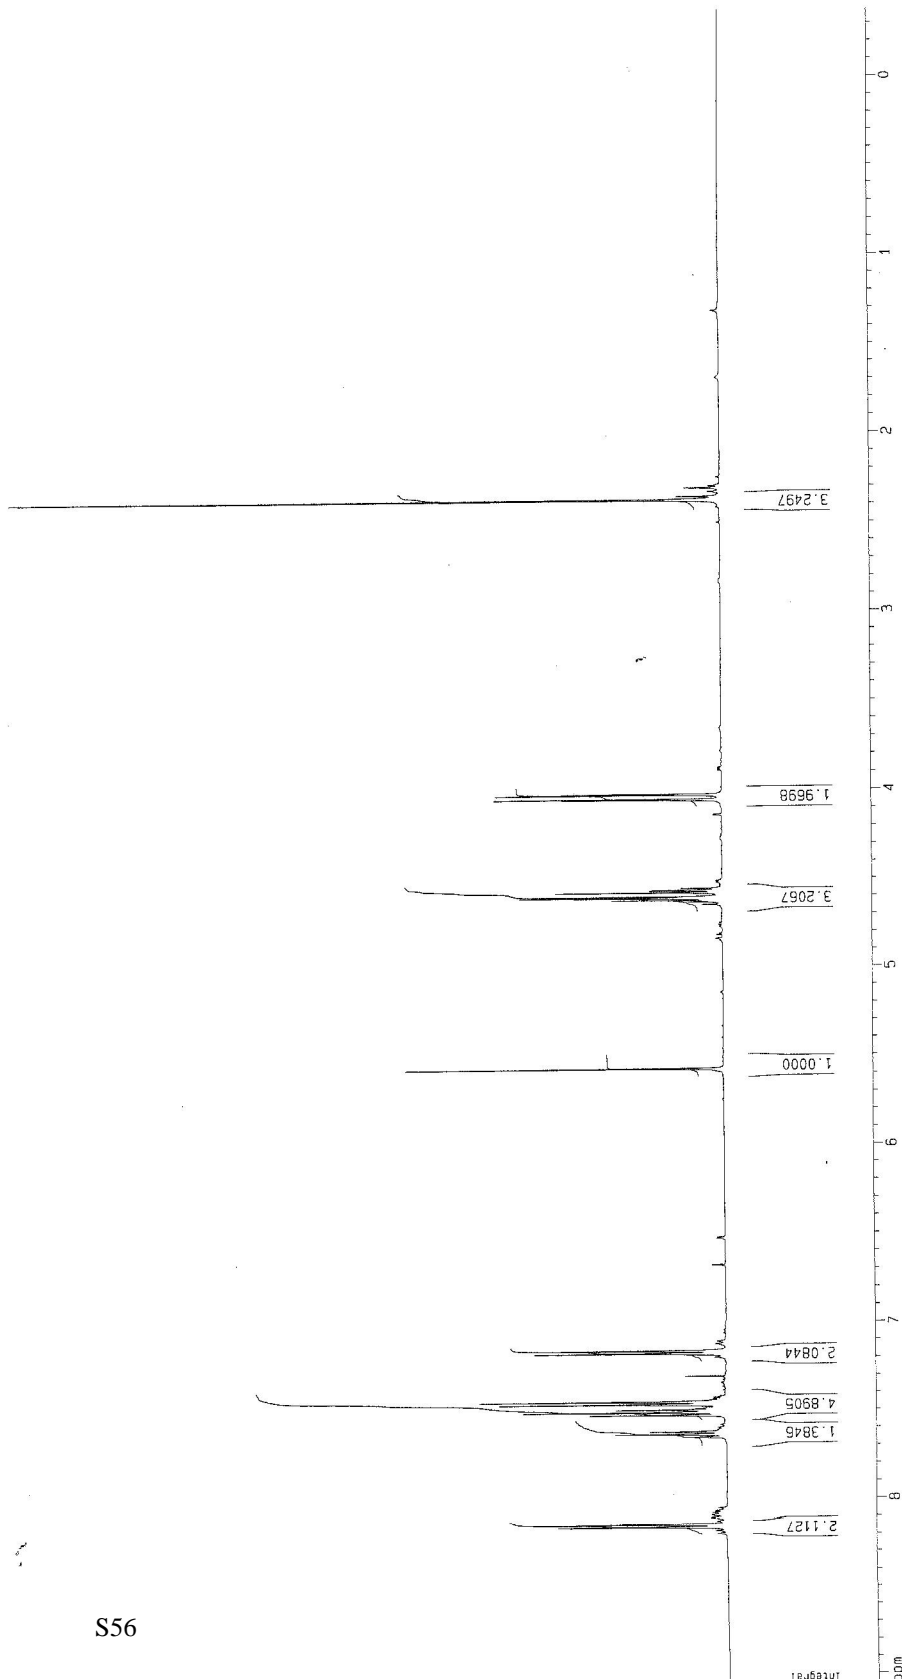

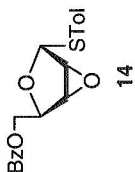

Current Data Parameters  
 NAME CALLAW  
 EXNO 51  
 PRGNO 1

F2 - Acquisition Parameters  
 Date\_ 20030327  
 Time 15.22  
 INSTRM spect  
 PROBRD 5 mm BBO BB-1  
 PULPROG zgpg30  
 TO 4.99330  
 DELTAT 0.00536  
 SOLVENT CDCl3  
 NS 4  
 DS 4  
 SWH 31445.541 Hz  
 FIDRES 0.479535 Hz  
 AQ 1.0420724 sec  
 RG 6584  
 RW 15.900 usec  
 DE 5.00 usec  
 TE 300.0 K  
 D1 2.0000000 sec  
 D11 0.0300000 sec  
 D12 0.0002000 sec

===== CHANNEL f1 =====  
 NUC1 <sup>13</sup>C  
 P1 8.00 usec  
 PL1 3.00 dB  
 SF01 125.7715719 MHz

===== CHANNEL f2 =====  
 CPDPRG2 waltz16  
 NUC2 <sup>1</sup>H  
 P2 100.00 usec  
 PL2 1.00 dB  
 PL12 19.80 dB  
 PL13 19.80 dB  
 SF02 500.1320005 MHz

F2 - Processing parameters  
 S1 32768  
 SF 125.7577390 MHz  
 N0 0  
 N1 0  
 N2 0  
 N3 0  
 N4 0  
 N5 0  
 N6 0  
 N7 0  
 N8 0  
 N9 0  
 N10 0  
 N11 0  
 N12 0  
 N13 0  
 N14 0  
 N15 0  
 N16 0  
 N17 0  
 N18 0  
 N19 0  
 N20 0  
 N21 0  
 N22 0  
 N23 0  
 N24 0  
 N25 0  
 N26 0  
 N27 0  
 N28 0  
 N29 0  
 N30 0  
 N31 0  
 N32 0  
 N33 0  
 N34 0  
 N35 0  
 N36 0  
 N37 0  
 N38 0  
 N39 0  
 N40 0  
 N41 0  
 N42 0  
 N43 0  
 N44 0  
 N45 0  
 N46 0  
 N47 0  
 N48 0  
 N49 0  
 N50 0  
 N51 0  
 N52 0  
 N53 0  
 N54 0  
 N55 0  
 N56 0  
 N57 0  
 N58 0  
 N59 0  
 N60 0  
 N61 0  
 N62 0  
 N63 0  
 N64 0  
 N65 0  
 N66 0  
 N67 0  
 N68 0  
 N69 0  
 N70 0  
 N71 0  
 N72 0  
 N73 0  
 N74 0  
 N75 0  
 N76 0  
 N77 0  
 N78 0  
 N79 0  
 N80 0  
 N81 0  
 N82 0  
 N83 0  
 N84 0  
 N85 0  
 N86 0  
 N87 0  
 N88 0  
 N89 0  
 N90 0  
 N91 0  
 N92 0  
 N93 0  
 N94 0  
 N95 0  
 N96 0  
 N97 0  
 N98 0  
 N99 0  
 N100 0  
 N101 0  
 N102 0  
 N103 0  
 N104 0  
 N105 0  
 N106 0  
 N107 0  
 N108 0  
 N109 0  
 N110 0  
 N111 0  
 N112 0  
 N113 0  
 N114 0  
 N115 0  
 N116 0  
 N117 0  
 N118 0  
 N119 0  
 N120 0  
 N121 0  
 N122 0  
 N123 0  
 N124 0  
 N125 0  
 N126 0  
 N127 0  
 N128 0  
 N129 0  
 N130 0  
 N131 0  
 N132 0  
 N133 0  
 N134 0  
 N135 0  
 N136 0  
 N137 0  
 N138 0  
 N139 0  
 N140 0  
 N141 0  
 N142 0  
 N143 0  
 N144 0  
 N145 0  
 N146 0  
 N147 0  
 N148 0  
 N149 0  
 N150 0  
 N151 0  
 N152 0  
 N153 0  
 N154 0  
 N155 0  
 N156 0  
 N157 0  
 N158 0  
 N159 0  
 N160 0  
 N161 0  
 N162 0  
 N163 0  
 N164 0  
 N165 0  
 N166 0  
 N167 0  
 N168 0  
 N169 0  
 N170 0  
 N171 0  
 N172 0  
 N173 0  
 N174 0  
 N175 0  
 N176 0  
 N177 0  
 N178 0  
 N179 0  
 N180 0  
 N181 0  
 N182 0  
 N183 0  
 N184 0  
 N185 0  
 N186 0  
 N187 0  
 N188 0  
 N189 0  
 N190 0  
 N191 0  
 N192 0  
 N193 0  
 N194 0  
 N195 0  
 N196 0  
 N197 0  
 N198 0  
 N199 0  
 N200 0  
 N201 0  
 N202 0  
 N203 0  
 N204 0  
 N205 0  
 N206 0  
 N207 0  
 N208 0  
 N209 0  
 N210 0  
 N211 0  
 N212 0  
 N213 0  
 N214 0  
 N215 0  
 N216 0  
 N217 0  
 N218 0  
 N219 0  
 N220 0  
 N221 0  
 N222 0  
 N223 0  
 N224 0  
 N225 0  
 N226 0  
 N227 0  
 N228 0  
 N229 0  
 N230 0  
 N231 0  
 N232 0  
 N233 0  
 N234 0  
 N235 0  
 N236 0  
 N237 0  
 N238 0  
 N239 0  
 N240 0  
 N241 0  
 N242 0  
 N243 0  
 N244 0  
 N245 0  
 N246 0  
 N247 0  
 N248 0  
 N249 0  
 N250 0  
 N251 0  
 N252 0  
 N253 0  
 N254 0  
 N255 0  
 N256 0  
 N257 0  
 N258 0  
 N259 0  
 N260 0  
 N261 0  
 N262 0  
 N263 0  
 N264 0  
 N265 0  
 N266 0  
 N267 0  
 N268 0  
 N269 0  
 N270 0  
 N271 0  
 N272 0  
 N273 0  
 N274 0  
 N275 0  
 N276 0  
 N277 0  
 N278 0  
 N279 0  
 N280 0  
 N281 0  
 N282 0  
 N283 0  
 N284 0  
 N285 0  
 N286 0  
 N287 0  
 N288 0  
 N289 0  
 N290 0  
 N291 0  
 N292 0  
 N293 0  
 N294 0  
 N295 0  
 N296 0  
 N297 0  
 N298 0  
 N299 0  
 N300 0  
 N301 0  
 N302 0  
 N303 0  
 N304 0  
 N305 0  
 N306 0  
 N307 0  
 N308 0  
 N309 0  
 N310 0  
 N311 0  
 N312 0  
 N313 0  
 N314 0  
 N315 0  
 N316 0  
 N317 0  
 N318 0  
 N319 0  
 N320 0  
 N321 0  
 N322 0  
 N323 0  
 N324 0  
 N325 0  
 N326 0  
 N327 0  
 N328 0  
 N329 0  
 N330 0  
 N331 0  
 N332 0  
 N333 0  
 N334 0  
 N335 0  
 N336 0  
 N337 0  
 N338 0  
 N339 0  
 N340 0  
 N341 0  
 N342 0  
 N343 0  
 N344 0  
 N345 0  
 N346 0  
 N347 0  
 N348 0  
 N349 0  
 N350 0  
 N351 0  
 N352 0  
 N353 0  
 N354 0  
 N355 0  
 N356 0  
 N357 0  
 N358 0  
 N359 0  
 N360 0  
 N361 0  
 N362 0  
 N363 0  
 N364 0  
 N365 0  
 N366 0  
 N367 0  
 N368 0  
 N369 0  
 N370 0  
 N371 0  
 N372 0  
 N373 0  
 N374 0  
 N375 0  
 N376 0  
 N377 0  
 N378 0  
 N379 0  
 N380 0  
 N381 0  
 N382 0  
 N383 0  
 N384 0  
 N385 0  
 N386 0  
 N387 0  
 N388 0  
 N389 0  
 N390 0  
 N391 0  
 N392 0  
 N393 0  
 N394 0  
 N395 0  
 N396 0  
 N397 0  
 N398 0  
 N399 0  
 N400 0  
 N401 0  
 N402 0  
 N403 0  
 N404 0  
 N405 0  
 N406 0  
 N407 0  
 N408 0  
 N409 0  
 N410 0  
 N411 0  
 N412 0  
 N413 0  
 N414 0  
 N415 0  
 N416 0  
 N417 0  
 N418 0  
 N419 0  
 N420 0  
 N421 0  
 N422 0  
 N423 0  
 N424 0  
 N425 0  
 N426 0  
 N427 0  
 N428 0  
 N429 0  
 N430 0  
 N431 0  
 N432 0  
 N433 0  
 N434 0  
 N435 0  
 N436 0  
 N437 0  
 N438 0  
 N439 0  
 N440 0  
 N441 0  
 N442 0  
 N443 0  
 N444 0  
 N445 0  
 N446 0  
 N447 0  
 N448 0  
 N449 0  
 N450 0  
 N451 0  
 N452 0  
 N453 0  
 N454 0  
 N455 0  
 N456 0  
 N457 0  
 N458 0  
 N459 0  
 N460 0  
 N461 0  
 N462 0  
 N463 0  
 N464 0  
 N465 0  
 N466 0  
 N467 0  
 N468 0  
 N469 0  
 N470 0  
 N471 0  
 N472 0  
 N473 0  
 N474 0  
 N475 0  
 N476 0  
 N477 0  
 N478 0  
 N479 0  
 N480 0  
 N481 0  
 N482 0  
 N483 0  
 N484 0  
 N485 0  
 N486 0  
 N487 0  
 N488 0  
 N489 0  
 N490 0  
 N491 0  
 N492 0  
 N493 0  
 N494 0  
 N495 0  
 N496 0  
 N497 0  
 N498 0  
 N499 0  
 N500 0  
 N501 0  
 N502 0  
 N503 0  
 N504 0  
 N505 0  
 N506 0  
 N507 0  
 N508 0  
 N509 0  
 N510 0  
 N511 0  
 N512 0  
 N513 0  
 N514 0  
 N515 0  
 N516 0  
 N517 0  
 N518 0  
 N519 0  
 N520 0  
 N521 0  
 N522 0  
 N523 0  
 N524 0  
 N525 0  
 N526 0  
 N527 0  
 N528 0  
 N529 0  
 N530 0  
 N531 0  
 N532 0  
 N533 0  
 N534 0  
 N535 0  
 N536 0  
 N537 0  
 N538 0  
 N539 0  
 N540 0  
 N541 0  
 N542 0  
 N543 0  
 N544 0  
 N545 0  
 N546 0  
 N547 0  
 N548 0  
 N549 0  
 N550 0  
 N551 0  
 N552 0  
 N553 0  
 N554 0  
 N555 0  
 N556 0  
 N557 0  
 N558 0  
 N559 0  
 N560 0  
 N561 0  
 N562 0  
 N563 0  
 N564 0  
 N565 0  
 N566 0  
 N567 0  
 N568 0  
 N569 0  
 N570 0  
 N571 0  
 N572 0  
 N573 0  
 N574 0  
 N575 0  
 N576 0  
 N577 0  
 N578 0  
 N579 0  
 N580 0  
 N581 0  
 N582 0  
 N583 0  
 N584 0  
 N585 0  
 N586 0  
 N587 0  
 N588 0  
 N589 0  
 N590 0  
 N591 0  
 N592 0  
 N593 0  
 N594 0  
 N595 0  
 N596 0  
 N597 0  
 N598 0  
 N599 0  
 N600 0  
 N601 0  
 N602 0  
 N603 0  
 N604 0  
 N605 0  
 N606 0  
 N607 0  
 N608 0  
 N609 0  
 N610 0  
 N611 0  
 N612 0  
 N613 0  
 N614 0  
 N615 0  
 N616 0  
 N617 0  
 N618 0  
 N619 0  
 N620 0  
 N621 0  
 N622 0  
 N623 0  
 N624 0  
 N625 0  
 N626 0  
 N627 0  
 N628 0  
 N629 0  
 N630 0  
 N631 0  
 N632 0  
 N633 0  
 N634 0  
 N635 0  
 N636 0  
 N637 0  
 N638 0  
 N639 0  
 N640 0  
 N641 0  
 N642 0  
 N643 0  
 N644 0  
 N645 0  
 N646 0  
 N647 0  
 N648 0  
 N649 0  
 N650 0  
 N651 0  
 N652 0  
 N653 0  
 N654 0  
 N655 0  
 N656 0  
 N657 0  
 N658 0  
 N659 0  
 N660 0  
 N661 0  
 N662 0  
 N663 0  
 N664 0  
 N665 0  
 N666 0  
 N667 0  
 N668 0  
 N669 0  
 N670 0  
 N671 0  
 N672 0  
 N673 0  
 N674 0  
 N675 0  
 N676 0  
 N677 0  
 N678 0  
 N679 0  
 N680 0  
 N681 0  
 N682 0  
 N683 0  
 N684 0  
 N685 0  
 N686 0  
 N687 0  
 N688 0  
 N689 0  
 N690 0  
 N691 0  
 N692 0  
 N693 0  
 N694 0  
 N695 0  
 N696 0  
 N697 0  
 N698 0  
 N699 0  
 N700 0  
 N701 0  
 N702 0  
 N703 0  
 N704 0  
 N705 0  
 N706 0  
 N707 0  
 N708 0  
 N709 0  
 N710 0  
 N711 0  
 N712 0  
 N713 0  
 N714 0  
 N715 0  
 N716 0  
 N717 0  
 N718 0  
 N719 0  
 N720 0  
 N721 0  
 N722 0  
 N723 0  
 N724 0  
 N725 0  
 N726 0  
 N727 0  
 N728 0  
 N729 0  
 N730 0  
 N731 0  
 N732 0  
 N733 0  
 N734 0  
 N735 0  
 N736 0  
 N737 0  
 N738 0  
 N739 0  
 N740 0  
 N741 0  
 N742 0  
 N743 0  
 N744 0  
 N745 0  
 N746 0  
 N747 0  
 N748 0  
 N749 0  
 N750 0  
 N751 0  
 N752 0  
 N753 0  
 N754 0  
 N755 0  
 N756 0  
 N757 0  
 N758 0  
 N759 0  
 N760 0  
 N761 0  
 N762 0  
 N763 0  
 N764 0  
 N765 0  
 N766 0  
 N767 0  
 N768 0  
 N769 0  
 N770 0  
 N771 0  
 N772 0  
 N773 0  
 N774 0  
 N775 0  
 N776 0  
 N777 0  
 N778 0  
 N779 0  
 N780 0  
 N781 0  
 N782 0  
 N783 0  
 N784 0  
 N785 0  
 N786 0  
 N787 0  
 N788 0  
 N789 0  
 N790 0  
 N791 0  
 N792 0  
 N793 0  
 N794 0  
 N795 0  
 N796 0  
 N797 0  
 N798 0  
 N799 0  
 N800 0  
 N801 0  
 N802 0  
 N803 0  
 N804 0  
 N805 0  
 N806 0  
 N807 0  
 N808 0  
 N809 0  
 N810 0  
 N811 0  
 N812 0  
 N813 0  
 N814 0  
 N815 0  
 N816 0  
 N817 0  
 N818 0  
 N819 0  
 N820 0  
 N821 0  
 N822 0  
 N823 0  
 N824 0  
 N825 0  
 N826 0  
 N827 0  
 N828 0  
 N829 0  
 N830 0  
 N831 0  
 N832 0  
 N833 0  
 N834 0  
 N835 0  
 N836 0  
 N837 0  
 N838 0  
 N839 0  
 N840 0  
 N841 0  
 N842 0  
 N843 0  
 N844 0  
 N845 0  
 N846 0  
 N847 0  
 N848 0  
 N849 0  
 N850 0  
 N851 0  
 N852 0  
 N853 0  
 N854 0  
 N855 0  
 N856 0  
 N857 0  
 N858 0  
 N859 0  
 N860 0  
 N861 0  
 N862 0  
 N863 0  
 N864 0  
 N865 0  
 N866 0  
 N867 0  
 N868 0  
 N869 0  
 N870 0  
 N871 0  
 N872 0  
 N873 0  
 N874 0  
 N875 0  
 N876 0  
 N877 0  
 N878 0  
 N879 0  
 N880 0  
 N881 0  
 N882 0  
 N883 0  
 N884 0  
 N885 0  
 N886 0  
 N887 0  
 N888 0  
 N889 0  
 N890 0  
 N891 0  
 N892 0  
 N893 0  
 N894 0  
 N895 0  
 N896 0  
 N897 0  
 N898 0  
 N899 0  
 N900 0  
 N901 0  
 N902 0  
 N903 0  
 N904 0  
 N905 0  
 N906 0  
 N907 0  
 N908 0  
 N909 0  
 N910 0  
 N911 0  
 N912 0  
 N913 0  
 N914 0  
 N915 0  
 N916 0  
 N917 0  
 N918 0  
 N919 0  
 N920 0  
 N921 0  
 N922 0  
 N923 0  
 N924 0  
 N925 0  
 N926 0  
 N927 0  
 N928 0  
 N929 0  
 N930 0  
 N931 0  
 N932 0  
 N933 0  
 N934 0  
 N935 0  
 N936 0  
 N937 0  
 N938 0  
 N939 0  
 N940 0  
 N941 0  
 N942 0  
 N943 0  
 N944 0  
 N945 0  
 N946 0  
 N947 0  
 N948 0  
 N949 0  
 N950 0  
 N951 0  
 N952 0  
 N953 0  
 N954 0  
 N955 0  
 N956 0  
 N957 0  
 N958 0  
 N959 0  
 N960 0  
 N961 0  
 N962 0  
 N963 0  
 N964 0  
 N965 0  
 N966 0  
 N967 0  
 N968 0  
 N969 0  
 N970 0  
 N971 0  
 N972 0  
 N973 0  
 N974 0  
 N975 0  
 N976 0  
 N977 0  
 N978 0  
 N979 0  
 N980 0  
 N981 0  
 N982 0  
 N983 0  
 N984 0  
 N985 0  
 N986 0  
 N987 0  
 N988 0  
 N989 0  
 N990 0  
 N991 0  
 N992 0  
 N993 0  
 N994 0  
 N995 0  
 N996 0  
 N997 0  
 N998 0  
 N999 0  
 N1000 0

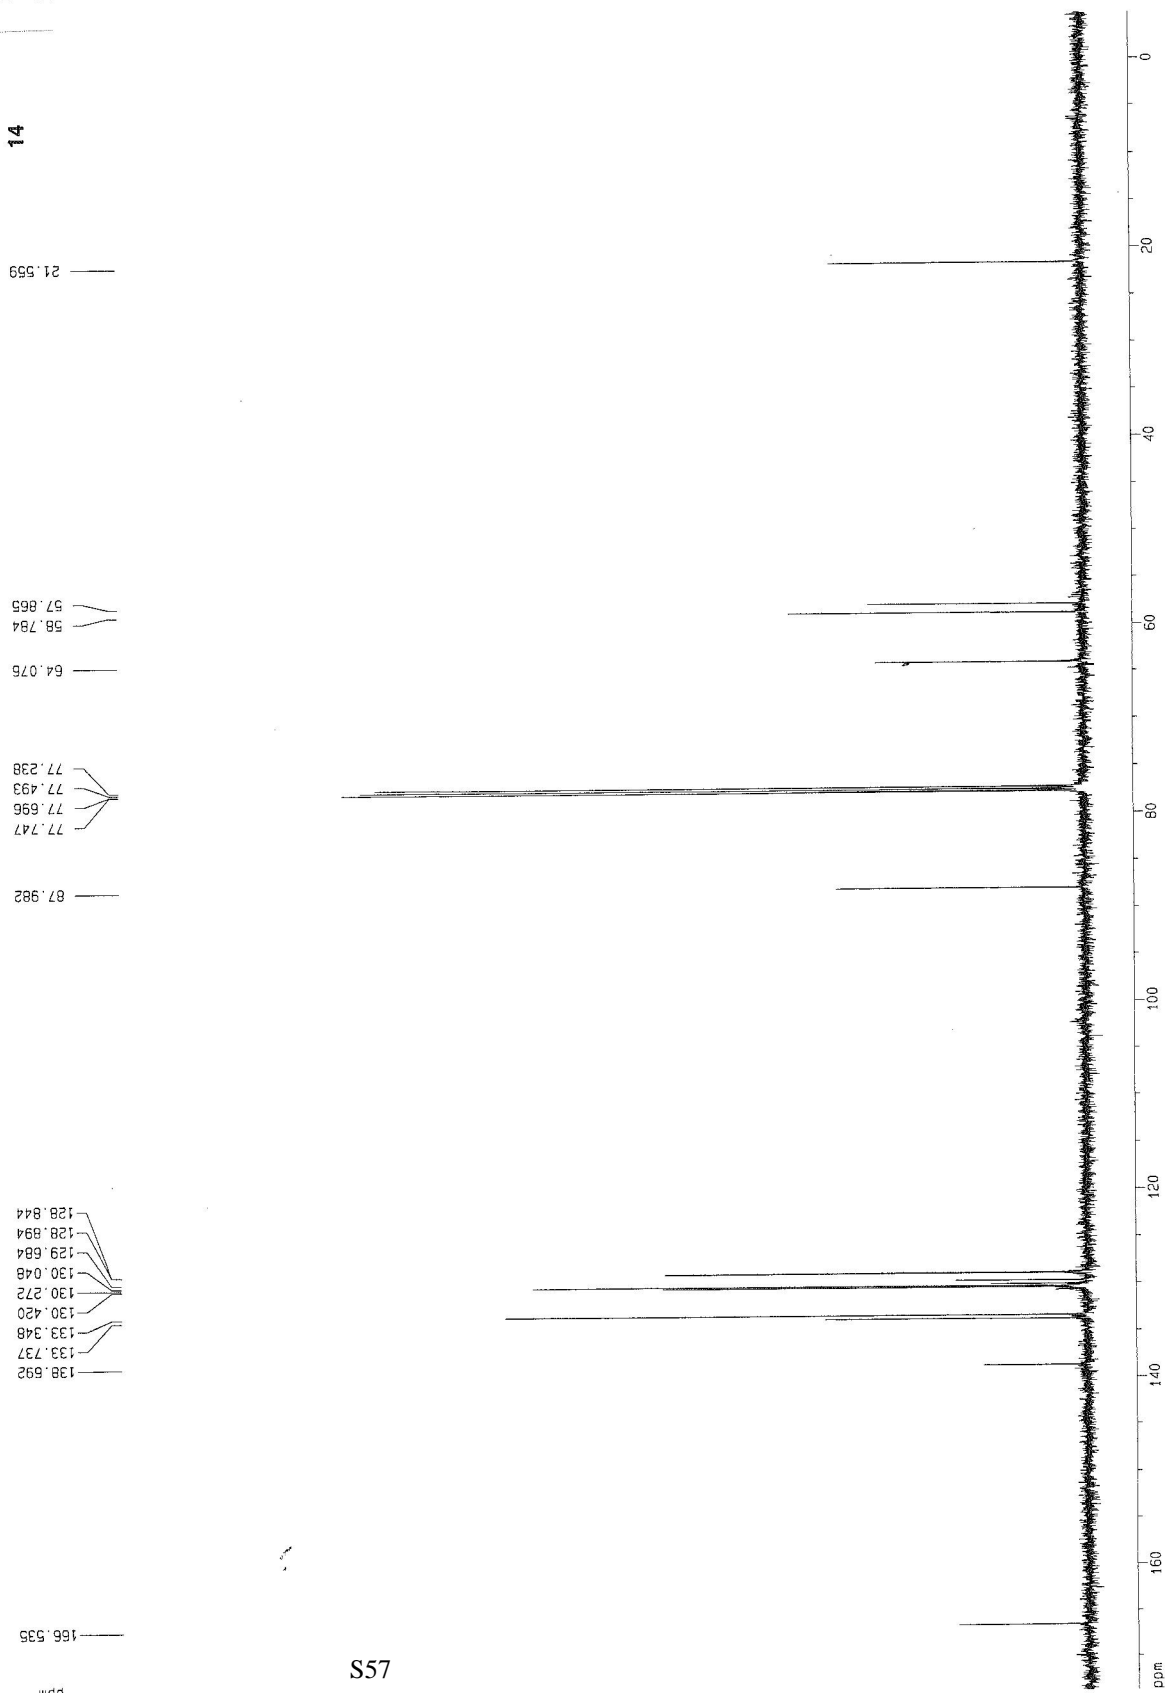

Current Data Parameters  
 NAME 02-10-01  
 EXNO 10  
 PROCNO 1

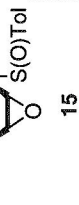

2.45150  
2.42186

4.87087  
4.72201  
4.65949  
4.64890  
4.63231  
4.62209  
4.61507  
4.60378  
4.51773  
4.31347  
4.06836  
4.06326

8.14646  
8.13053  
7.65832  
7.64361  
7.62983  
7.58630  
7.57230  
7.53578  
7.52097  
7.50807  
7.50490  
7.37509  
7.35992  
7.30638

===== CHANNEL f1 =====  
 NUC1 1H  
 P1 13.70 usec  
 PL1 -1.00 dB  
 SF01 500.1330895 MHz  
 F2 - Processing parameters  
 SI 32768  
 SF 500.1330895 MHz  
 NDM EM  
 SSB 0  
 LB 0.30 Hz  
 GB 0  
 PC 1.00  
 1D NMR plot parameters  
 CX 34.00 cm  
 F1P 6.507 ppm  
 F1 4304.57 Hz  
 F2P -0.374 ppm  
 F2 -187.18 Hz  
 PPMCM 0.26417 ppm/cm  
 HZCM 132.11905 Hz/cm

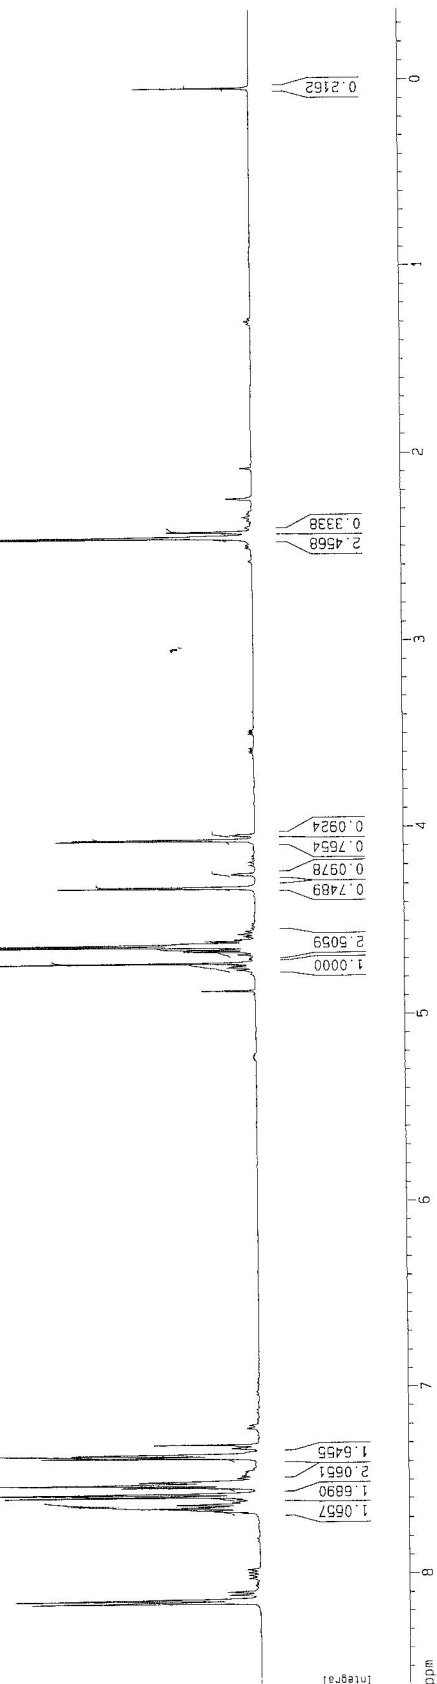

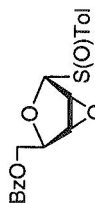

15

Current Data Parameters  
 NAME 02-10-01  
 EXPNO 11  
 PROCNO 1  
 F2 - Acquisition Parameters  
 Date\_ 20010210  
 Time 7.29  
 INSTRUM spect  
 PROBHD 5 mm BBO BB-1  
 PULPROG zgpg30  
 TD 65536  
 SOLVENT CDCl3  
 NS 114  
 DS 4  
 SWH 31446.541 Hz  
 FIDRES 0.479636 Hz  
 AQ 1.0420724 sec  
 RG 8192  
 DW 15.900 usec  
 DE 6.00 usec  
 TE 300.0 K  
 D1 2.00000000 sec  
 D11 0.03000000 sec  
 D12 0.00020000 sec  
 ===== CHANNEL f1 =====  
 NUC1 13C  
 P1 8.00 usec  
 PL1 3.00 dB  
 SF01 125.771519 MHz  
 ===== CHANNEL f2 =====  
 CPDPRG2 waltz16  
 NUC2 1H  
 PCPD2 100.00 usec  
 PL2 -1.00 dB  
 PL12 18.80 dB  
 PL13 18.80 dB  
 SF02 500.1320005 MHz  
 F2 - Processing parameters  
 SI 32768  
 SF 125.7577390 MHz  
 KM EM  
 SSB 0  
 LB 1.00 Hz  
 GB 0  
 PC 1.40  
 1D NMR plot parameters  
 CX 34.00 cm  
 F1P 183.260 ppm  
 F1 23046.39 Hz  
 F2P -7.363 ppm  
 F2 -926.00 Hz  
 PPM0M 5.60558 ppm/cm  
 HZCM 205.07025 Hz/cm

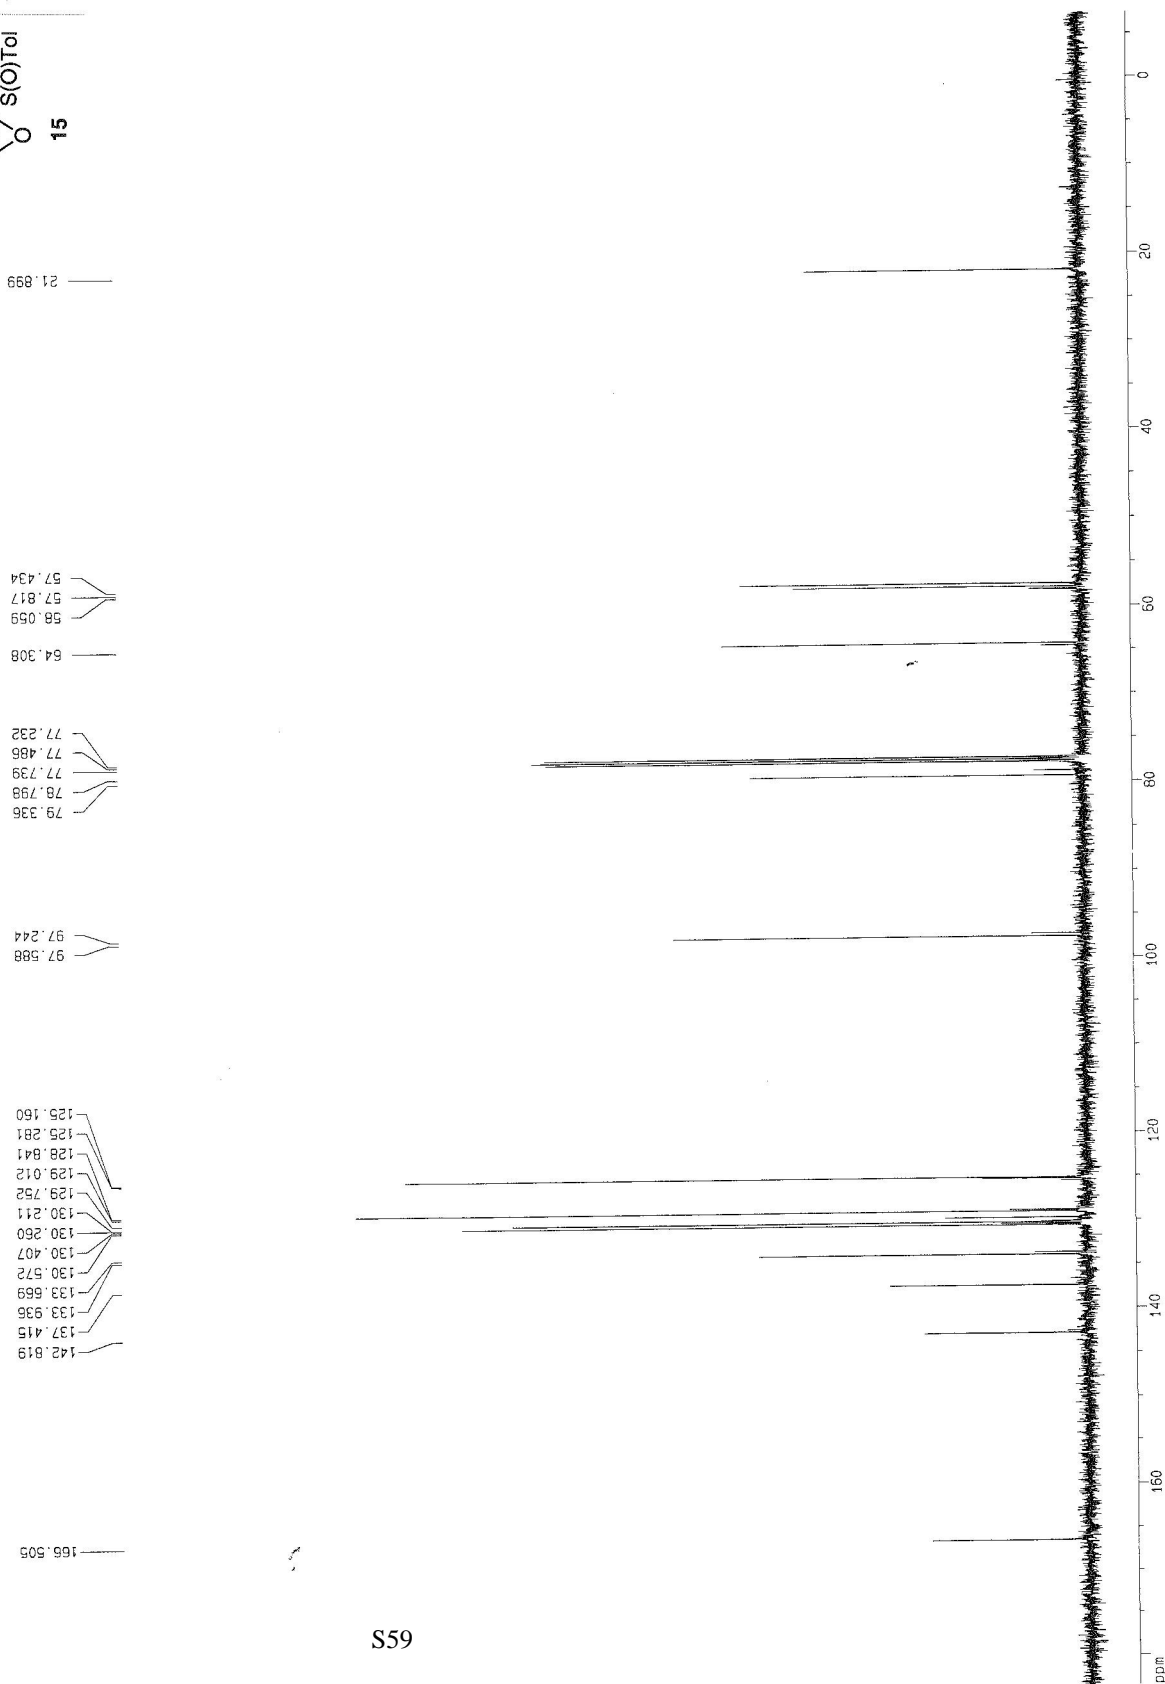



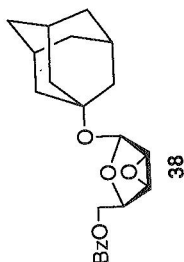

Current Data Parameters  
NAME 12-15-00  
EXPNO 30  
PROCNO 1

F2 - Acquisition Parameters  
Date 2001215  
Time 7.24  
INSTRUM spect  
PROBHD 5 mm BBO BB-1  
PULPROG zg30  
TO 65536  
SOLVENT CDCl3  
NS 23  
DS 2  
SWH 10330.578 Hz  
FIDRES 0.157632 Hz  
AQ 3.1719923 sec  
RG 35.9  
DM 48.400 usec  
DE 6.00 usec  
TE 300.0 K  
D1 1.0000000 sec

===== CHANNEL f1 =====  
NUC1 1H  
P1 13.70 usec  
PL1 -1.00 dB  
SFO1 500.1330885 MHz

F2 - Processing parameters  
SI 32768  
SF 500.1300000 MHz  
WDW EM  
SSB 0  
LB 0.30 Hz  
GB 0  
PC 1.00

1D NMR plot parameters  
CX 34.00 cm  
F1P 8.427 ppm  
F1 4214.35 Hz  
F2P -0.239 ppm  
F2 -119.29 Hz  
PPM0 0.25465 ppm/cm  
HZCM 127.45984 Hz/cm

2.18609  
1.90547  
1.88199  
1.87553  
1.86899  
1.84546  
1.68322  
1.65209  
1.64587  
1.62063

4.61321  
4.60140  
4.59124  
4.57925  
4.57658  
4.56290  
4.55449  
4.54091  
4.18892  
4.17583  
4.16364  
3.77574  
3.76995  
3.68754  
3.68174

5.43588  
5.32089

8.09600  
8.09438  
8.08017  
8.0742  
7.60223  
7.60012  
7.58746  
7.57474  
7.57252  
7.47948  
7.46380  
7.44835  
7.30646

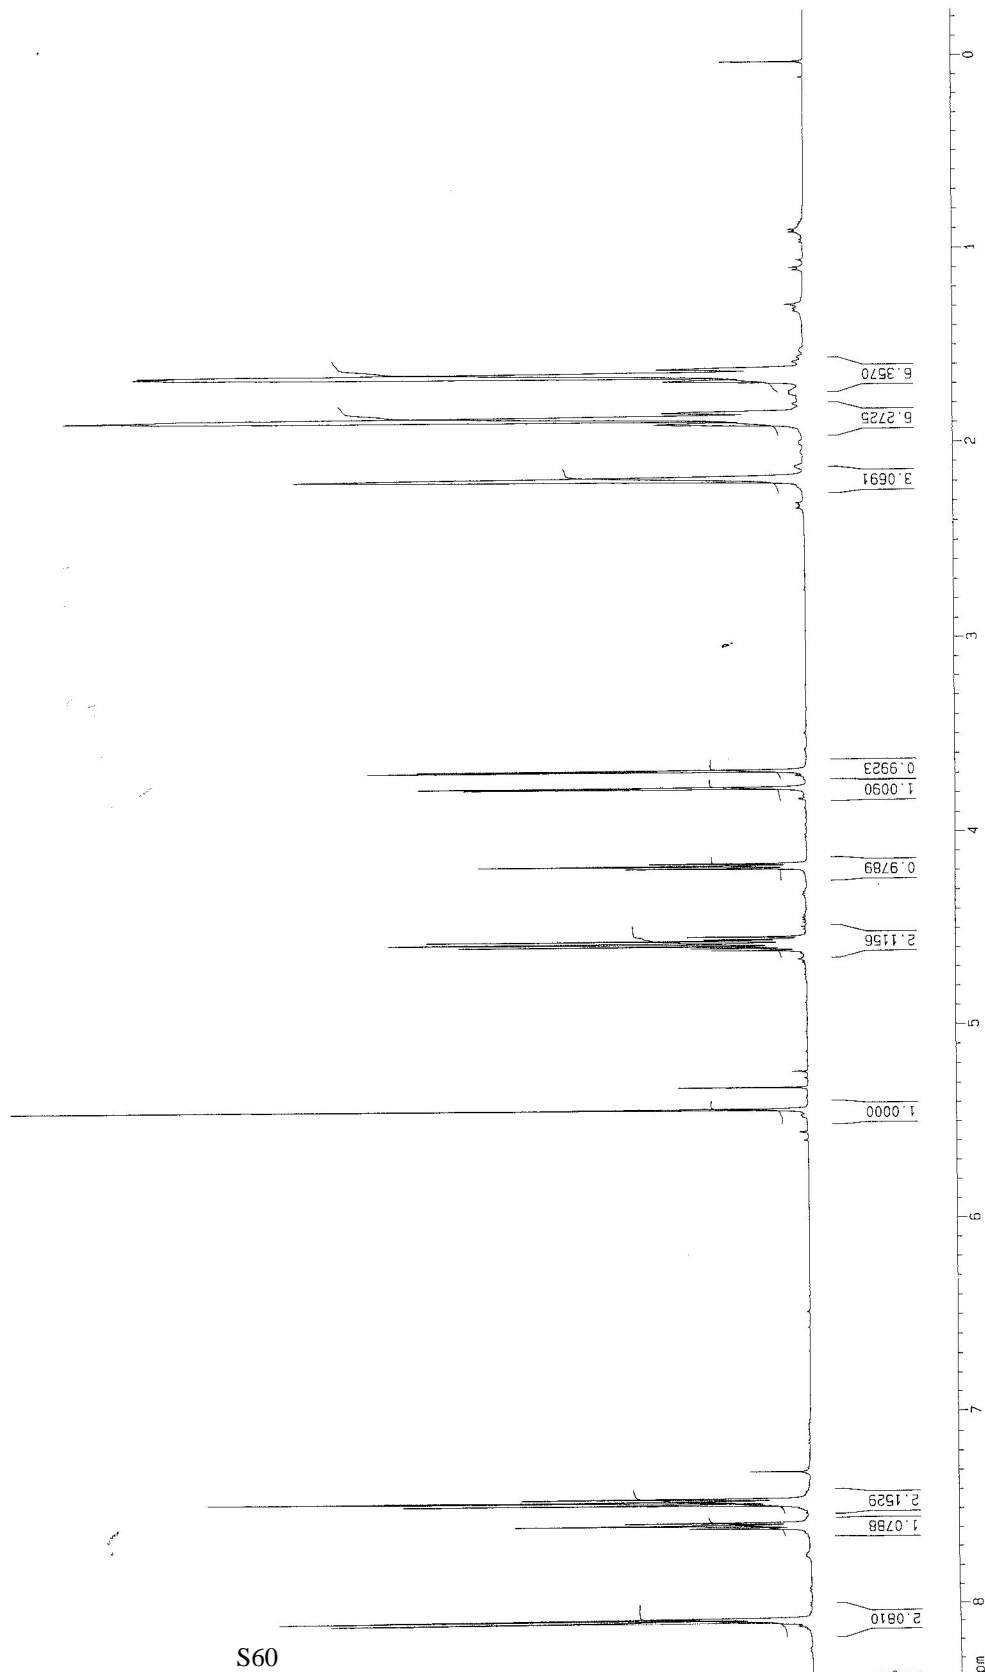

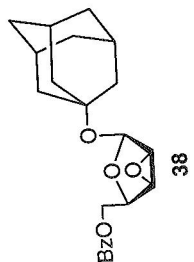

Current Data Parameters  
NAME 12-15-00  
EXPNO 31  
PROCNO 1

F2 - Acquisition Parameters

Date\_ 20011215  
Time 7:27  
INSTRUM spect  
PROBHD 5 mm BBO BB-1  
PULPROG zgpg30  
TD 65536  
SOLVENT CDCl3  
NS 28  
DS 4  
SWH 31446.541 Hz  
FIDRES 0.475935 Hz  
AQ 1.042024 sec  
RG 4096  
DM 15.500 usec  
DE 6.00 usec  
TE 300.0 K  
D1 2.00000000 sec  
D11 0.03000000 sec  
D12 0.00002000 sec

===== CHANNEL f1 =====

NUC1 13C  
P1 8.00 usec  
PL1 3.00 dB  
SF01 125.7715719 MHz

===== CHANNEL f2 =====

CPDPRG2 waltz16  
NUC2 1H  
PCPD2 100.00 usec  
PL2 -1.00 dB  
PL12 18.80 dB  
PL13 18.80 dB  
SF02 500.1350005 MHz

F2 - Processing parameters

SF 32768  
SF 125.7577390 MHz  
WDW EM  
SSB 0  
LB 1.00 Hz  
GB 0  
PC 1.40

1D NMR plot parameters

CX 34.00 cm  
F1P 177.783 ppm  
F1 22357.53 Hz  
F2P -3.803 ppm  
F2 -478.24 Hz  
PPMCM 5.34075 ppm/cm  
HZCM 671.64020 Hz/cm

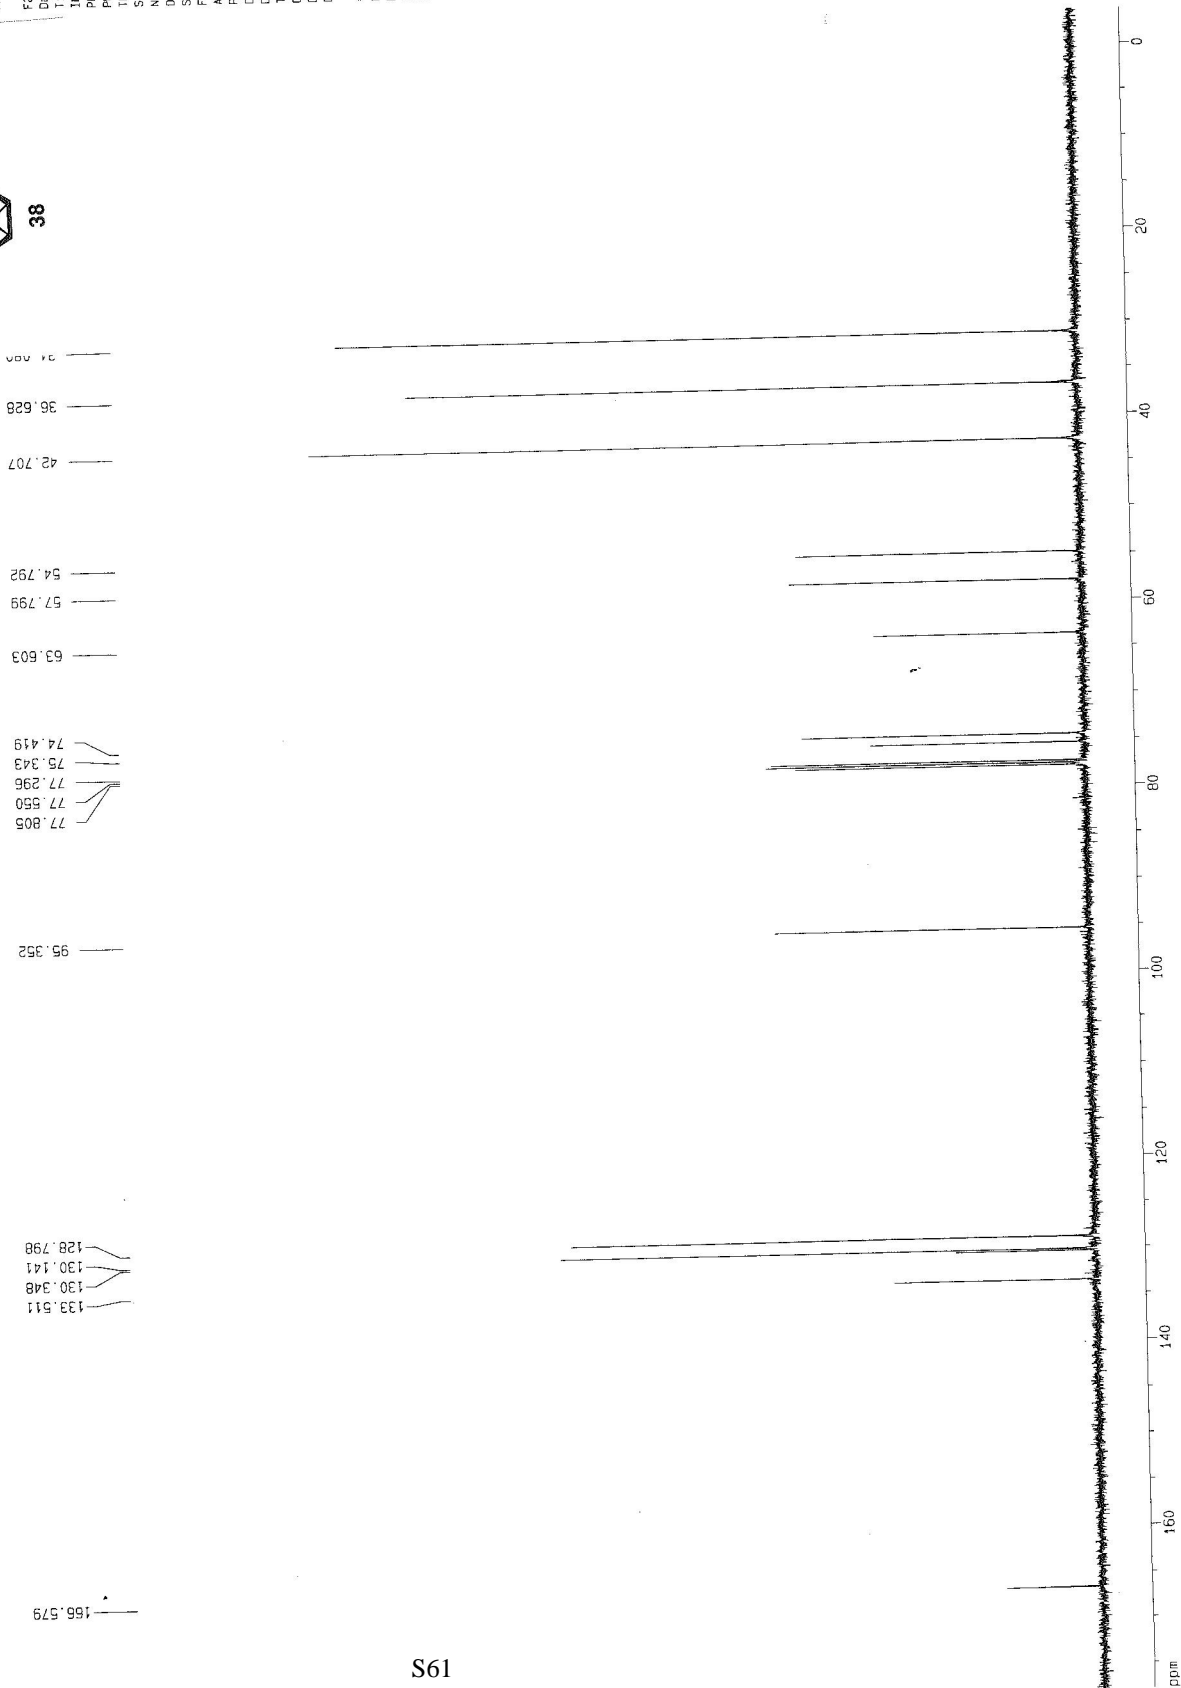

Current Data Parameters  
 NAME 6-25-01-2  
 EXPNO 1  
 PROCNO 1

F2 - Acquisition Parameters  
 Date\_ 20010625  
 Time 14.11  
 INSTRUM spect  
 PROBHD 5 mm BBO BB-1  
 PULPROG zg30  
 TO 65536  
 SOLVENT CDCl3  
 NS 15  
 DS 2  
 SWH 10330.578 Hz  
 FIDRES 0.157632 Hz  
 AQ 3.1719823 sec  
 RG 80.6  
 DW 48.400 usec  
 DE 6.00 usec  
 TE 300.0 K  
 D1 1.00000000 sec

\*\*\*\*\* CHANNEL f1 \*\*\*\*\*  
 NUCl 1H  
 P1 13.70 usec  
 PL1 -1.00 dB  
 SF01 500.1300885 MHz

F2 - Processing parameters  
 SI 32768  
 SF 500.1300000 MHz  
 MDW EM  
 SSB 0  
 LB 0.30 Hz  
 GB 0  
 PC 1.00

1D NMR plot parameters  
 CX 34.00 cm  
 F1P 8.477 ppm  
 F1 4239.84 Hz  
 F2P -0.102 ppm  
 F2 -50.95 Hz  
 PPRCH 0.25233 ppm/cm  
 HZCH 126.19930 Hz/cm

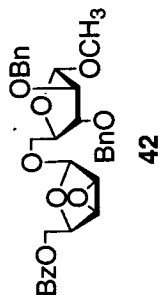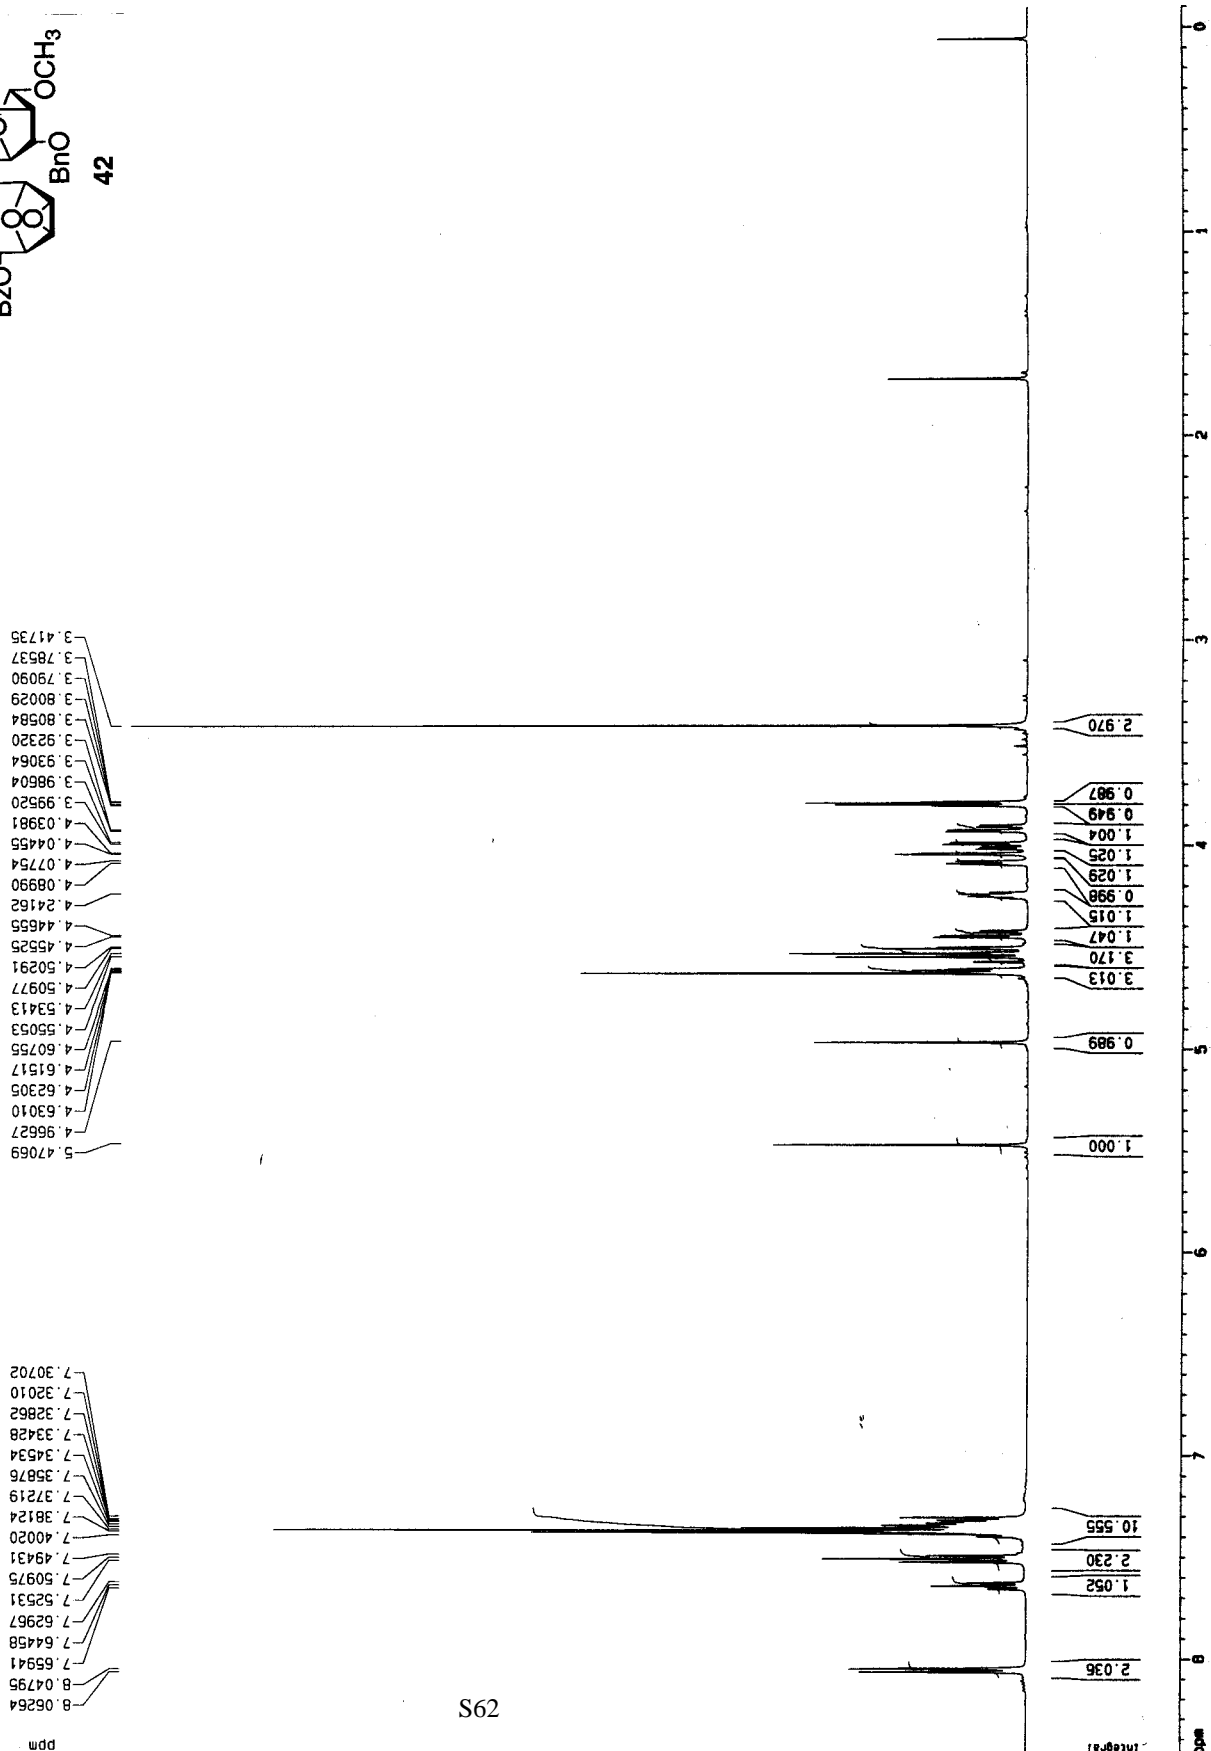

disaccharide epoxide

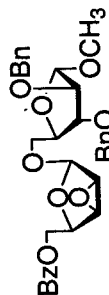

42

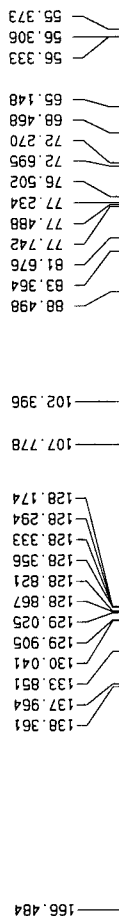

Current Data Parameters  
 NAME 6-25-01-2  
 EXPNO 2  
 PROCNO 1

F2 - Acquisition Parameters  
 Date\_ 20010625  
 Time 14.17  
 INSTRUM spect  
 PROBHD 5 mm BBO BB-1  
 PULPROG zgpg30  
 TO 85536  
 SOLVENT CDCl3  
 NS 161  
 DS 4  
 SWH 31446.541 Hz  
 FIDRES 0.475936 Hz  
 AQ 1.0420724 sec  
 RG 8192  
 DM 15.900 usec  
 DE 6.00 usec  
 TE 300.0 K  
 D1 2.00000000 sec  
 D11 0.03000000 sec  
 D12 0.00002000 sec

\*\*\*\*\* CHANNEL f1 \*\*\*\*\*  
 NUC1 13C  
 P1 8.00 usec  
 PL1 3.00 dB  
 SF01 125.771519 MHz

\*\*\*\*\* CHANNEL f2 \*\*\*\*\*  
 CDPRG2 waltz16  
 NUC2 1H  
 PCPQ2 100.00 usec  
 PL2 -1.00 dB  
 PL12 18.80 dB  
 PL13 18.80 dB  
 SF02 500.1320005 MHz

F2 - Processing parameters  
 SI 32768  
 SF 125.7577590 MHz  
 WDW EM  
 SSB 0  
 LB 1.00 Hz  
 GB 0  
 PC 1.40

1D NMR plot parameters  
 CX 34.00 cm  
 F1P 215.000 ppm  
 F1 27037.32 Hz  
 F2P -5.000 ppm  
 F2 -628.79 Hz  
 PPMCH 6.47059 ppm/cm  
 HZCM 813.72650 Hz/cm

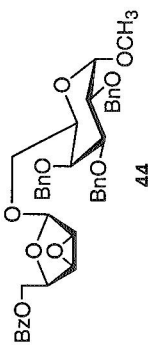

Current Data Parameters  
 NAME 12-7-00  
 EXPNO 50  
 PROCNO 1

F2 - Acquisition Parameters  
 Date\_ 2001207  
 Time 18.39  
 INSTRUM spect  
 PULPROG 5 mm BBO BB-1  
 TO 6536  
 SOLVENT CDCl3  
 NS 17  
 DS 2  
 SWH 10330.578 Hz  
 FIDRES 0.157632 Hz  
 AQ 3.1719923 sec  
 RG 128  
 DW 48.400 usec  
 DE 6.00 usec  
 TE 300.0 K  
 D1 1.00000000 sec

===== CHANNEL f1 =====  
 NUC1 1H  
 P1 13.70 usec  
 PL1 -1.00 dB  
 SF01 500.1330085 MHz

F2 - Processing parameters  
 SI 32768  
 SF 500.1330000 MHz  
 RGW EM  
 SSF 0  
 LB 0.30 Hz  
 GB 0  
 PC 1.00

1D NMR plot parameters  
 CX 34.00 cm  
 FIP 8.653 ppm  
 F1 4327.50 Hz  
 F2 -0.216 ppm  
 F2 -107.98 Hz  
 FPMCM 0.26084 ppm/cm  
 HZCM 130.45508 Hz/cm

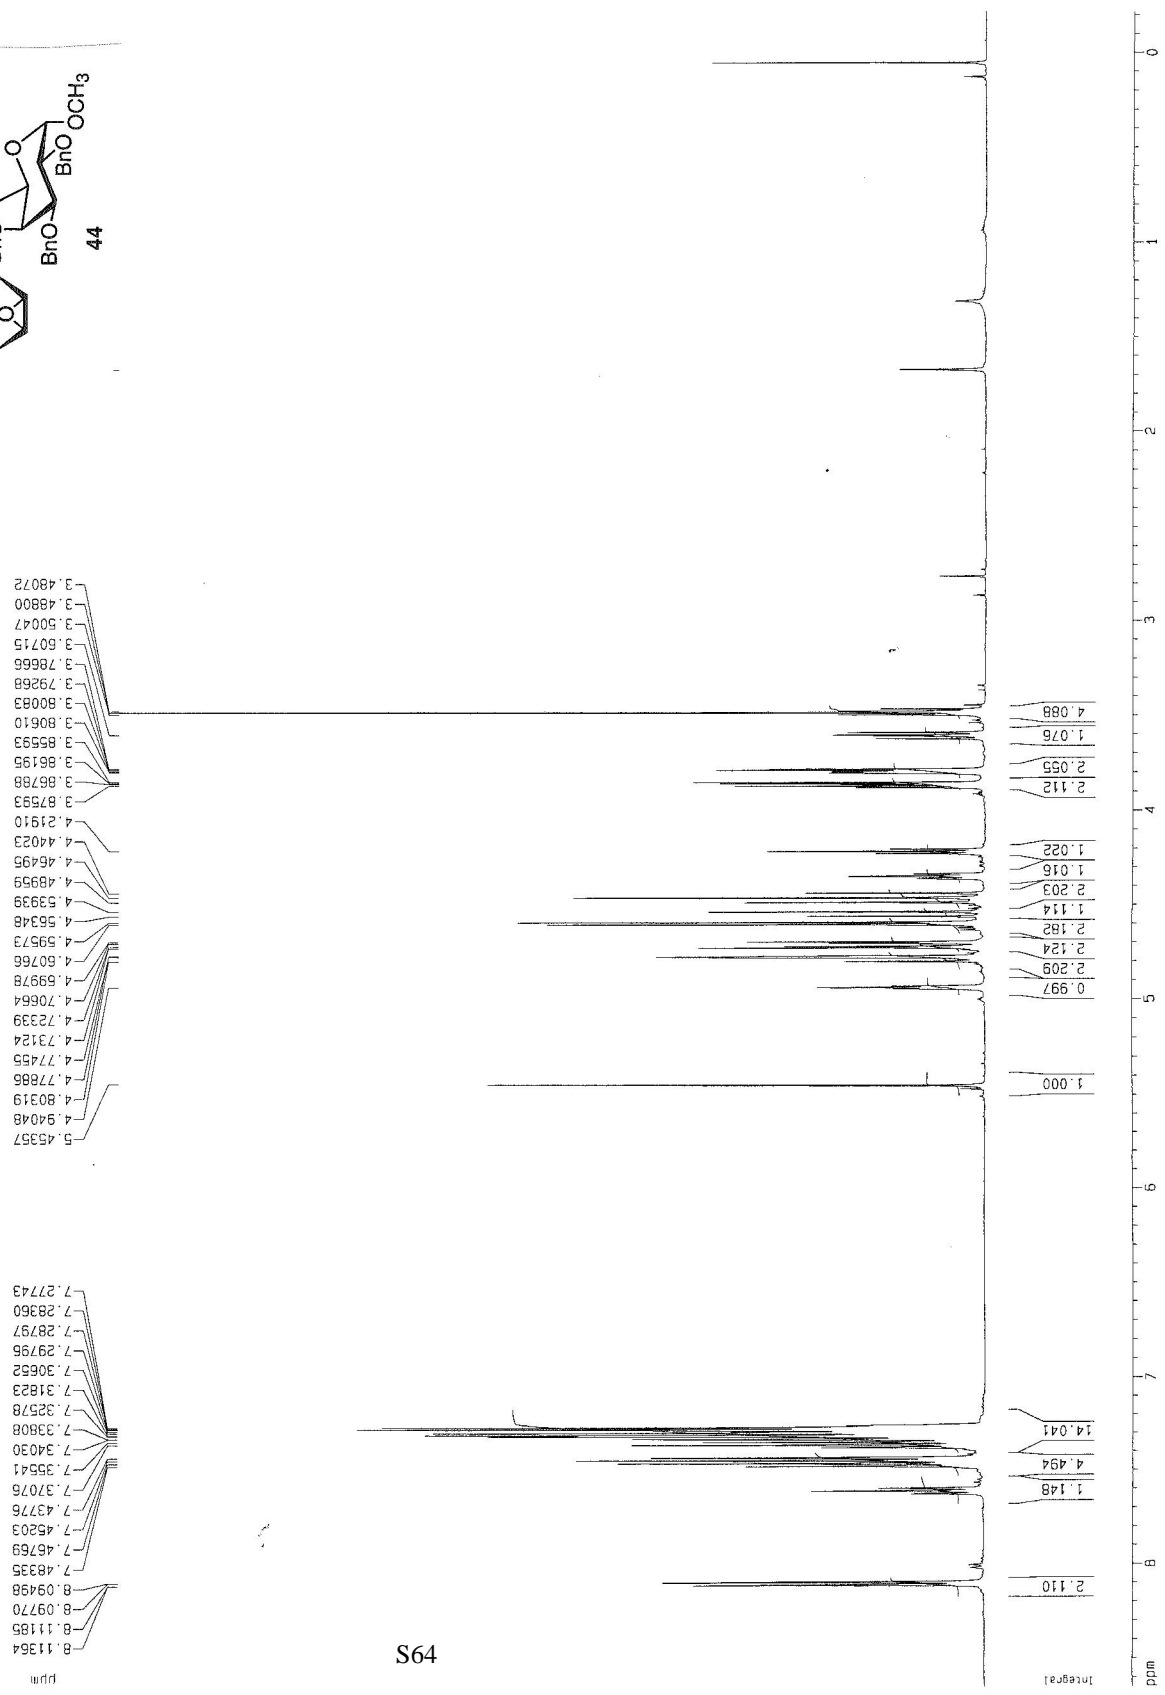

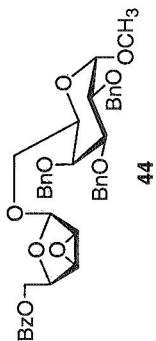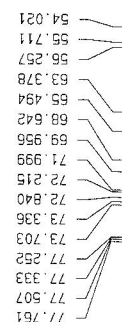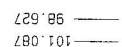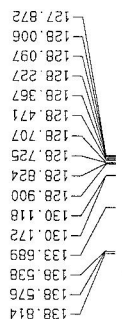

Current Data Parameters  
 NAME 12-7-00  
 EXPNO 11  
 PROCNO 1  
 F2 - Acquisition Parameters  
 Date\_ 20001207  
 Time 8.12  
 INSTRUM spect  
 PROBHD 5 mm BBO BB-1  
 PULPROG zgpg30  
 TO 65536  
 SOLVENT CDCl<sub>3</sub>  
 NS 101  
 DS 4  
 SWH 31446.541 Hz  
 FIDRES 0.475935 Hz  
 AQ 1.0420724 sec  
 RG 4096  
 DM 15.900 usec  
 DE 6.00 usec  
 TE 300.0 K  
 D1 2.00000000 sec  
 D11 0.03000000 sec  
 D12 0.00020000 sec  
 ===== CHANNEL f1 =====  
 NUC1 13C  
 P1 8.00 usec  
 PL1 3.00 dB  
 SF01 125.7715719 MHz  
 ===== CHANNEL f2 =====  
 CPDPRG2 waltz16  
 NUC2 1H  
 P2 100.00 usec  
 PL2 -1.00 dB  
 PL12 18.80 dB  
 PL13 18.80 dB  
 SF02 500.1320005 MHz  
 F2 - Processing parameters  
 SI 32768  
 SF 125.7577390 MHz  
 KW EM  
 SSB 0  
 LB 1.00 Hz  
 GB 0  
 PC 1.40  
 1D NMR plot parameters  
 CX 34.00 cm  
 F1P 184.355 ppm  
 F1 23184.16 Hz  
 F2P -2.160 ppm  
 F2 -271.58 Hz  
 PPMCM 5.48574 ppm/cm  
 HZCM 689.87475 Hz/cm







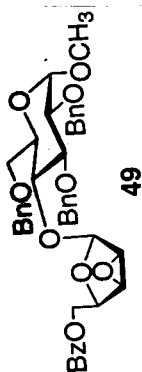

Current Data Parameters  
NAME CALLAM  
EXPNO 70  
PROCNO 1

F2 - Acquisition Parameters  
Date\_ 2003027  
Time 15.34  
INSTRUM spect  
PROBHD 5 mm BBO BB-1  
PULPROG zg30  
TD 65536  
SOLVENT CDCl3  
NS 22  
DS 2  
FIDRES 10330.578 Hz  
AQ 0.157632 Hz  
RG 114  
DM 48.400 usec  
DE 6.00 usec  
TE 300.0 K  
D1 1.00000000 sec

\*\*\*\*\* CHANNEL f1 \*\*\*\*\*  
NUC1 1H  
P1 13.70 usec  
PL1 -1.00 dB  
SF01 500.1330885 MHz

F2 - Processing parameters  
SI 32768  
SF 500.1300000 MHz  
WDW EN  
SSB 0  
LB 0.30 Hz  
GB 0  
PC 1.00

1D NMR plot parameters  
CX 34.00 cm  
F1P 8.606 ppm  
F1 4304.22 Hz  
F2P -0.500 ppm  
F2 -250.25 Hz  
PPM0 0.26784 ppm/cm  
HZCM 133.95497 Hz/cm

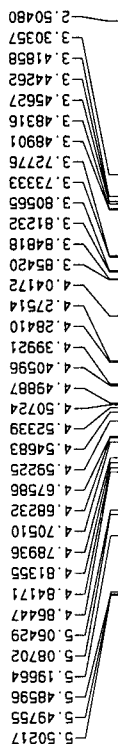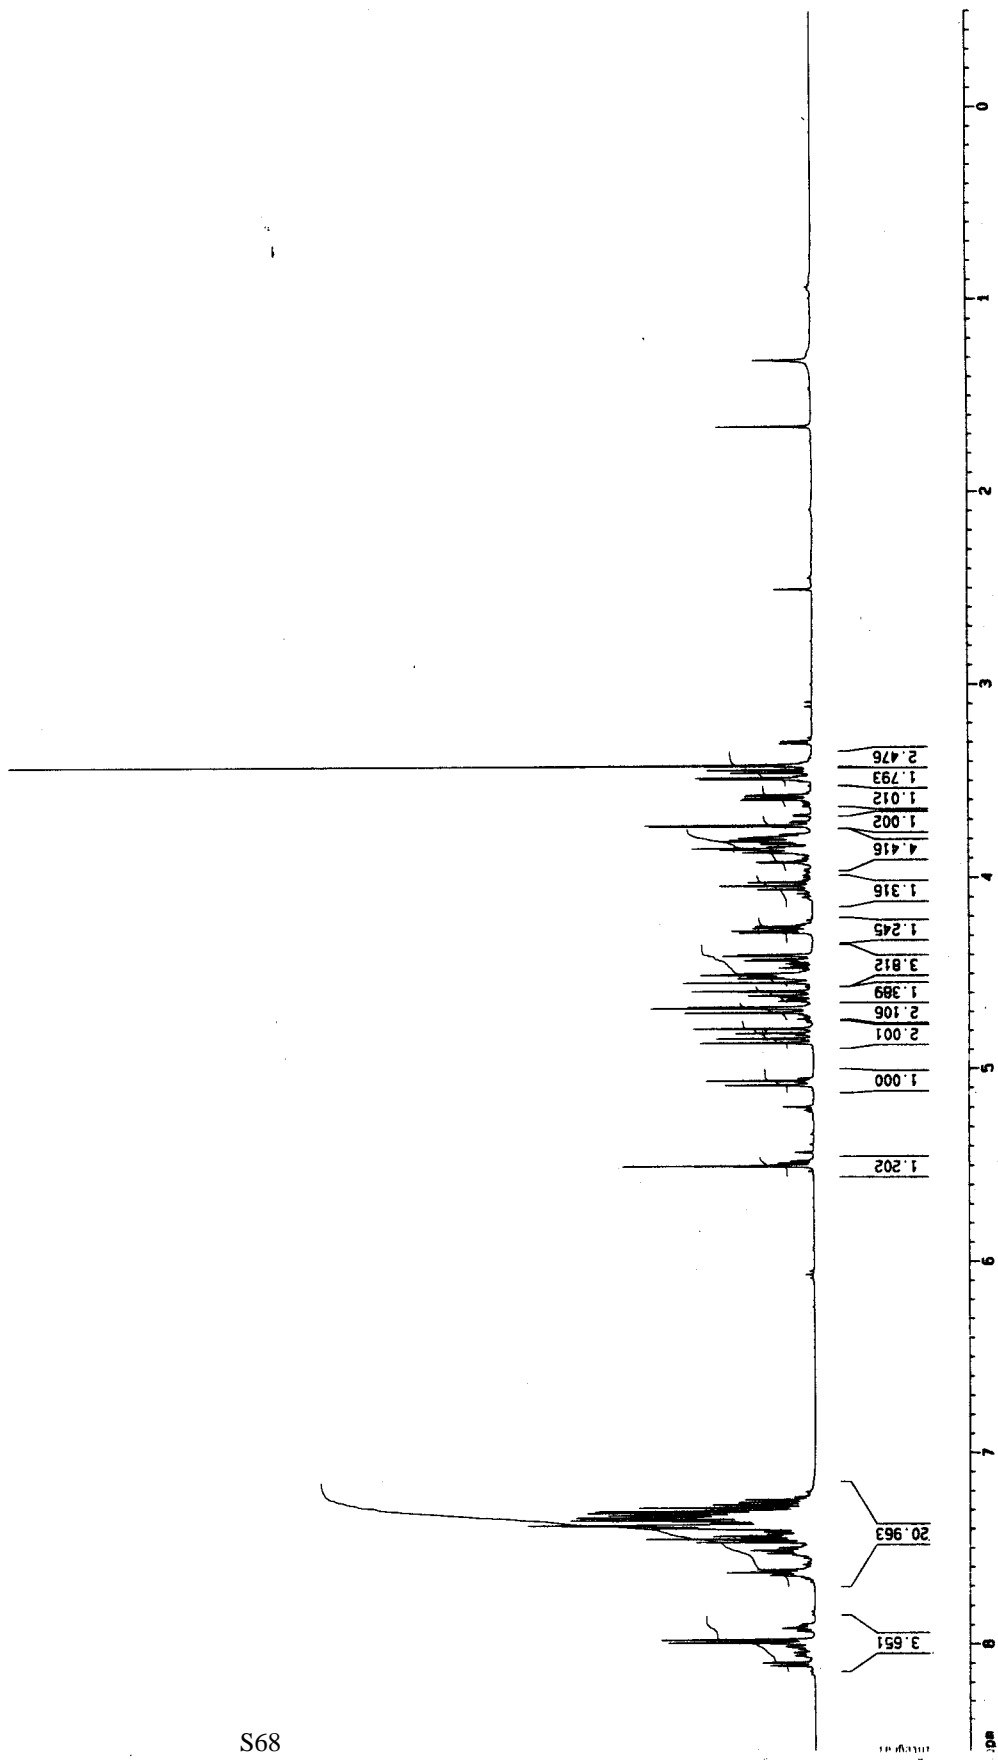

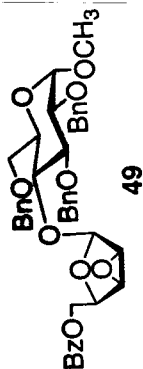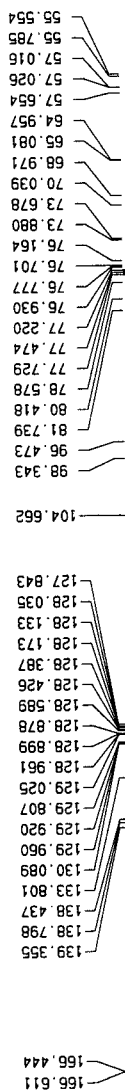

Current Data Parameters  
NAME CALLAM  
EXPNO 71  
PROCNO 1

F2 - Acquisition Parameters  
Date\_ 20020327  
Time 15:56  
INSTRUM spect  
PROBHD 5 mm BBO BB-1  
PULPROG zgpg30  
TO 65536  
SOLVENT CDCl3  
NS 1024  
DS 4  
SWH 31446.541 Hz  
FIDRES 0.479836 Hz  
AQ 1.0420724 sec  
RG 8192  
DM 15.900 usec  
DE 6.00 usec  
TE 300.0 K  
D1 2.00000000 sec  
D11 0.03000000 sec  
D12 0.00020000 sec

===== CHANNEL f1 =====  
NUC1 13C  
P1 8.00 usec  
PL1 3.00 dB  
SF01 125.7715719 MHz

===== CHANNEL f2 =====  
CPDPRG2 waltz16  
NUC2 1H  
PCPD2 100.00 usec  
PL2 -1.00 dB  
PL12 18.80 dB  
PL13 18.80 dB  
SF02 500.1320005 MHz

F2 - Processing parameters  
SI 32768  
SF 125.7577390 MHz  
WDW EM  
SSB 0  
LB 1.00 Hz  
GB 0  
PC 1.40

1D NMR plot parameters  
CX 24.00 cm  
F1P 185.645 ppm  
F1 23346.26 Hz  
F2P -8.425 ppm  
F2 -1060.02 Hz  
PPHOM 5.70805 ppm/cm  
HZCM 717.83148 Hz/cm

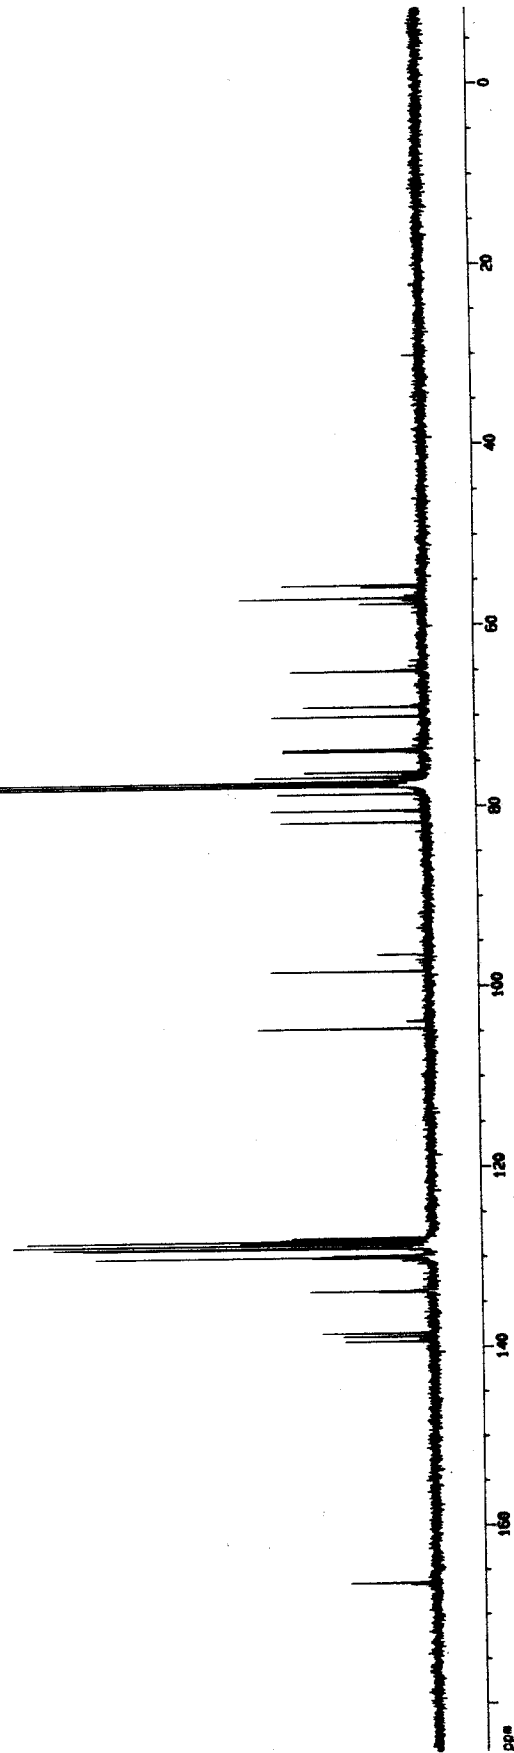

Supplement: Supplementary file 1 [file 5736777]
